# Supplementary material
Source: PubMed Central journal article supplement (PMC3402234)
Supplement: NIHMS391706-supplement-1_si_001.pdf [file NIHMS391706-supplement-1_si_001.pdf]

# ***Effect of Isotopically Sensitive Branching on Product Distribution for Pentalenene Synthase – Support for a Mechanism Predicted by Quantum Chemistry***

Liansuo Zu,<sup>‡</sup> Meimei Xu,<sup>Ω</sup> Michael W. Lodewyk,<sup>‡</sup> David E. Cane,<sup>§\*</sup> Reuben J. Peters,<sup>Ω\*</sup> Dean J. Tantillo<sup>‡\*</sup>

<sup>‡</sup> Department of Chemistry, University of California–Davis, Davis, CA 95616

<sup>Ω</sup> Department of Biochemistry, Biophysics & Molecular Biology, Iowa State University, Ames, IA 50011

<sup>§</sup> Department of Chemistry, Box H, Brown University, Providence, RI 02912-9108

## *Contents*

Pg. S2-S3 — Data on enzyme assays.

Pg. S4-S5 — Information on computational methods.

Pg. S6-S28 — Atomic coordinates and energies for computed structures.

Pg. S29-S30 — Details on synthesis of deuterium-labeled FPP.

## Enzyme assays

To simplify purification of pentalenene synthase (PS), 6×His tags were added to the wild-type and H309A mutant. This was accomplished by PCR based sub-cloning, from the originally reported expression constructs,<sup>1,2</sup> first into pENTR/SD/D-TOPO via directional topoisomerization, with verification by complete gene sequencing, followed by directional recombination into pDEST17, which adds an N-terminal 6×His tag and linker (all vectors and molecular biology reagents were obtained from Invitrogen).

Expression was carried out in the C41 OverExpress strain of *E. coli* (Lucigen), which was transformed with the pDEST17/PS or pDEST17/PS:H309A constructs. These were then grown in 100 mL liquid NZY media in an incubator shaker at 37 °C to OD<sub>600</sub> ~0.6, then the temperature reduced to 16 °C, and the cultures induced with 0.5 mM IPTG one hour later. Following fermentation overnight (~16 h), the cells were harvested by centrifugation (20 min. × 6,000g), resuspended in lysis buffer (50 mM Tris-HCl, pH 6.8, 150 mM KCl, 10 mM MgCl<sub>2</sub>, 10 % (v/v) glycerol), and lysed by sonication. The resulting lysate was clarified by centrifugation (20 min. × 8,000g), and pentalene synthase purified using Ni-resin following the manufacturers directions (Thermo Scientific). The purified protein was then dialyzed against storage buffer (20 mM Tris-HCl, pH 7.8, 150 mM KCl, 10% (v/v) glycerol).

Assays were performed in triplicate, using 1 mL the previously defined assay buffer (50 mM Tris-HCl, pH 8.2, 5 mM MgCl<sub>2</sub>, 1 mM DTT, 1 mM EDTA, 0.2 mM PMSF, 20% (v/v) glycerol)<sup>1</sup> in capped 13×100 mm glass tubes with 3 μM pentalenene synthase (wild-type or H309A mutant), initiated by the addition of 20 μM FPP (unlabeled or [6-<sup>2</sup>H] labeled), and overlaid with 0.5 mL hexane. These reactions were incubated overnight (~16 h) at 30 °C, then terminated by the addition of 0.1 mL 100 mM EDTA (pH 8.0). The resulting sesquiterpenes were extracted by vortexing the quenched reaction with its hexane overlay, with removal of the hexane to a clean glass tube, and subsequent re-extraction with another 1 mL of hexane. The pooled extracts were then dried under nitrogen gas and resuspended in 0.1 mL of hexane for analysis by gas chromatography with mass spectrometry detection (GC-MS). This was carried out on a Varian (Palo Alto, CA) 3900 GC with Saturn 2100 ion trap mass spectrometer (MS) in electron ionization (70 eV) mode. Separation of the injected sample (1 μL; split injection with an injector port temperature of 250 °C) was achieved using an HP-5 column with a H<sub>2</sub> flow rate of 2 mL/min with a temperature program of 3 min. at 50 °C, followed by a gradient from 50 to 300 °C at 14 °C/min. with a 3 min. hold at 300 °C, with collection of mass spectra data from *m/z* from 90 to 650.

Pentalenene was easily identified as the sole enzymatic product from incubations of wild-type PS (with either unlabeled or [6-<sup>2</sup>H]-FPP as substrate), as well as by comparative searches of its mass spectra against the MassFinder database. As previously reported,<sup>2</sup> the H309A mutant produces only three sesquiterpenes (Figure 1), pentalenene (**1**), protoilludene (**2**), and germacrene A, which was detected as the Cope rearrangement product  $\beta$ -elemene, with identification of the latter two confirmed by both comparative searches of their mass spectra using MassFinder (Figure S1), as well as self-consistent retention indexes – e.g., the retention time (RT) for pentalenene is 11.02 min., with reported retention index (RI) of 1343; the peak corresponding to  $\beta$ -elemene has RT = 11.53 min. and reported RI = 1389; such that the RT of 11.41 min. for the protoilludene peak leads to a calculated RI of 1378, very similar to the reported RI of 1382.

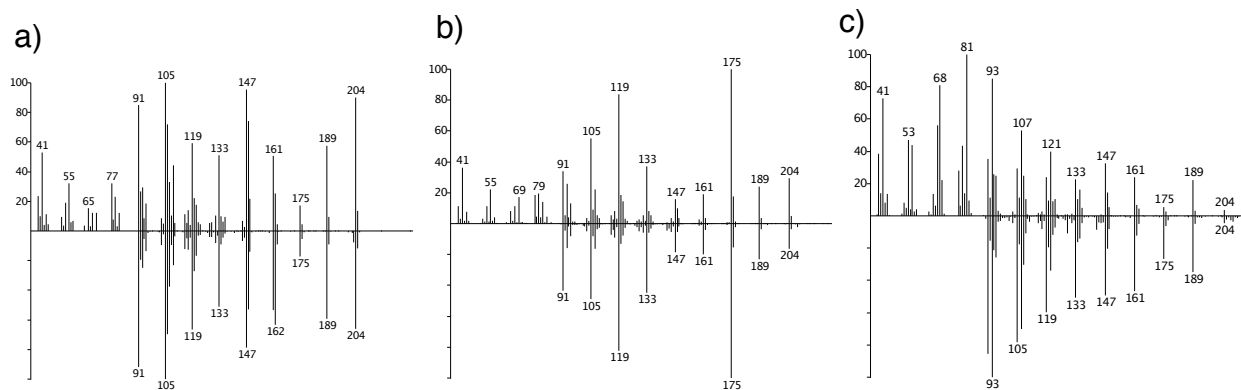

Figure S1: Comparison of mass spectra for authentic sesquiterpene standards (top) and enzymatic product peaks (bottom) from PS:H309A reacting with unlabeled FPP (those with [6-<sup>2</sup>H]-FPP show the expected increase in parent  $m/z$  from 204 to 205). a) Pentalenene and peak at RT = 11.02 min. b) Protoilludene and peak at RT = 11.41 min. c)  $\beta$ -elemene and peak at RT = 11.53 min.

#### Enzyme assay references

1. D. E. Cane, J. K. Sohng, C. R. Lamberson, S. M. Rudnicki, Z. Wu, M. D. Lloyd, J. S. Oliver and B. R. Hubbard, *Biochemistry*, 1994, **33**, 5846-5857.
2. M. Seemann, G. Zhai, K. Umezawa and D. Cane, *J. Am. Chem. Soc.*, 1999, **121**, 591-592.

## Computational Methods

All calculations were performed with Gaussian03.<sup>G03</sup> Geometries were optimized in the gas phase without symmetry constraints using the B3LYP/6-31+G(d,p) method.<sup>B3LYP</sup> Frequency calculations at the same level of theory were used to characterize each stationary point as a minimum or first order transition state structure. Single point calculations on the computed geometries were performed with the mPW1PW91/6-31+G(d,p) method<sup>mpw1pw91</sup> and reported energies include zero point correction from B3LYP frequency calculations at 298.15 K. Intrinsic Reaction Coordinate (IRC) calculations<sup>IRC</sup> were performed for each reaction step. Some of these calculations were unsuccessful, particularly where the potential energy surface appears to be relatively flat. In these cases, the transition state structures were linked to their corresponding minima by perturbing the structures in both directions along the imaginary frequency coordinate and minimizing the resulting structure. Structural images were produced with *Ball and Stick* version 4.0.<sup>B&S</sup>

## Calculation of $k_H/k_D$ kinetic isotope effects (KIEs)

Predicted KIE values for each step of the pathway leading to protoilludene and pentalenene were computed using the Bigeleisen and Mayer method, as implemented in *Quiver*.<sup>quiver</sup> For this analysis, the computed frequencies were scaled by 0.9648<sup>scaled</sup> and a temperature of 303 K was specified in accord with the experimental conditions. The table below summarizes the computed KIE values for each step.

| <u>Reaction Step</u> | <u>Computed KIE value</u> |
|----------------------|---------------------------|
| A→B                  | 1.01                      |
| B→C1                 | 1.05                      |
| C1→protoilludene     | 1.79                      |
| C2→protoilludene     | 1.55                      |
| C1→C2                | 0.90                      |
| C2→C3                | 1.02                      |
| C3→C4                | 0.94                      |
| C4→D'                | 1.10                      |
| D'→E'                | 1.01                      |
| E'→F                 | 0.99                      |
| F→pentalenene        | 1.02, 1.04                |

C1-C4 refer to different conformers of this structure present along the computed pathway.

For the deprotonation steps leading to protoilludene and pentalenene,  $\text{H}_2\text{PO}_4^-$  was utilized as a model for the pyrophosphate. Note that conformers C1 and C2 can both lead to protoilludene, resulting in a predicted KIE range of 1.55-1.79. Two unique transition state structures from the same reactant were located for the deprotonation leading to pentalenene. From the branch point of conformer C1, a net KIE range of 0.96 - 0.98 is predicted for pentalenene. Thus we do not see evidence that the small KIE values for this branch constitute a significant effect when taken together.

## Computational references:

### G03

*GAUSSIAN03*, Revision D.01, Frisch, M. J.; Trucks, G. W.; Schlegel, H. B.; Scuseria, G. E.; Robb, M. A.; Cheeseman, J. R.; Montgomery, Jr., J. A.; Vreven, T.; Kudin, K. N.; Burant, J. C.; Millam, J. M.; Iyengar, S. S.; Tomasi, J.; Barone, V.; Mennucci, B.; Cossi, M.; Scalmani, G.; Rega, N.; Petersson, G. A.; Nakatsuji, H.; Hada, M.; Ehara, M.; Toyota, K.; Fukuda, R.; Hasegawa, J.; Ishida, M.; Nakajima, T.; Honda, Y.; Kitao, O.; Nakai, H.; Klene, M.; Li, X.; Knox, J. E.; Hratchian, H. P.; Cross, J. B.; Bakken, V.; Adamo, C.; Jaramillo, J.; Gomperts, R.; Stratmann, R. E.; Yazyev, O.; Austin, A. J.; Cammi, R.; Pomelli, C.; Ochterski, J. W.; Ayala, P. Y.; Morokuma, K.; Voth, G. A.; Salvador, P.; Dannenberg, J. J.; Zakrzewski, V. G.; Dapprich, S.; Daniels, A. D.; Strain, M. C.; Farkas, O.; Malick, D. K.; Rabuck, A. D.; Raghavachari, K.; Foresman, J. B.; Ortiz, J. V.; Cui, Q.; Baboul, A. G.; Clifford, S.; Cioslowski, J.; Stefanov, B. B.; Liu, G.; Liashenko, A.; Piskorz, P.; Komaromi, I.; Martin, R. L.; Fox, D. J.; Keith, T.; Al-Laham, M. A.; Peng, C. Y.; Nanayakkara, A.; Challacombe, M.; Gill, P. M. W.; Johnson, B.; Chen, W.; Wong, M. W.; Gonzalez, C.; Pople, J. A. Gaussian, Inc., Wallingford CT, **2004**.

### B3LYP

- a. Becke, A.D. *J. Chem. Phys.* **1993**, *98*, 1372-1377.
- b. Becke, A.D. *J. Chem. Phys.* **1993**, *98*, 5648-5652.
- c. Lee, C.; Yang, W.; Parr, R.G. *Phys. Rev. B* **1988**, *37*, 785-789.
- d. Stephens, P.J.; Devlin, F. J.; Chabalowski, C.F.; Frisch, M. J. *J. Phys. Chem.* **1994**, *98*, 11623-11627.
- e. Tirado-Rives, J.; Jorgensen, W. L. *J. Chem. Theory Comput.* **2008**, *4*, 297-306.

### mpw1pw91

Matsuda, S.P.T.; Wilson, W.K.; Xiong, Q. *Org. Biomol. Chem.* **2006**, *4*, 530-543.

### IRC

- a. Gonzalez, C.; Schlegel, H. B. *J. Phys. Chem.* **1990**, *94*, 5523-5527.
- b. Fukui, K. *Acc. Chem. Res.* **1981**, *14*, 363-368.

### B&S

Müller, N.; Falk, A. Ball & Stick 4.0a12, molecular graphics software for MacOS, Johannes Kepler University Linz, 2004.

### quiver

- a. Bigeleisen, J.; Mayer, M. G. *J. Chem. Phys.* **1947**, *15*, 261-267.
- b. Saunders, W.; Laidig, K. E.; Wolfsberg, M. *J. Am. Chem. Soc.* **1989**, *111*, 8989-8994.
- c. A modified version of *Quiver* provided by Prof. Daniel Singleton (Texas A&M) was utilized.

### scaled

Merrick, J. P.; Moran, D.; Radom, L. *J. Phys. Chem. A* **2007**, *111*, 11683-11700.

## Computed Energies and Coordinates

*Distances are shown in angstroms*

### Structure A

B3LYP electronic energy: -586.3694874 H

B3LYP zero-point energy: 0.364004 H

mPW1PW91 electronic energy: -586.2301285 H

Coordinates (from last standard orientation):

| Center Number | Atomic Number | Coordinates (Angstroms) |           |           |
|---------------|---------------|-------------------------|-----------|-----------|
|               |               | X                       | Y         | Z         |
| 1             | 6             | 2.252808                | 0.874856  | 1.359109  |
| 2             | 1             | 2.841119                | 1.779050  | 1.182616  |
| 3             | 1             | 1.255413                | 1.171165  | 1.688914  |
| 4             | 1             | 2.734403                | 0.309743  | 2.162904  |
| 5             | 6             | 2.170796                | 0.059468  | 0.041802  |
| 6             | 6             | 1.705979                | -1.297628 | 0.311392  |
| 7             | 6             | 0.804367                | -2.180111 | -0.378614 |
| 8             | 1             | 1.269554                | -3.170116 | -0.457324 |
| 9             | 6             | -0.498235               | -2.461103 | 0.621686  |
| 10            | 1             | -0.729248               | -3.510899 | 0.427877  |
| 11            | 6             | -1.653524               | -1.556786 | 0.315496  |
| 12            | 6             | -1.800409               | -0.421891 | 1.028106  |
| 13            | 6             | -2.743795               | 0.723223  | 0.765118  |
| 14            | 1             | -3.763899               | 0.372438  | 0.575817  |
| 15            | 1             | -2.793985               | 1.355816  | 1.656423  |
| 16            | 6             | -2.288686               | 1.581728  | -0.466676 |
| 17            | 6             | -0.793683               | 1.857710  | -0.479376 |
| 18            | 6             | 1.512103                | 0.865786  | -1.116989 |
| 19            | 1             | 1.975816                | 1.857880  | -1.099982 |
| 20            | 1             | 1.812096                | 0.412891  | -2.069494 |
| 21            | 6             | -2.536431               | -1.970165 | -0.836106 |
| 22            | 1             | -2.943744               | -2.974462 | -0.669814 |
| 23            | 1             | -3.377923               | -1.290054 | -0.976499 |
| 24            | 1             | -1.982834               | -2.009264 | -1.784507 |
| 25            | 1             | 2.164875                | -1.740942 | 1.200087  |
| 26            | 6             | 3.673790                | -0.310647 | -0.380504 |
| 27            | 1             | 4.136602                | 0.653749  | -0.615196 |
| 28            | 1             | 3.714381                | -0.938840 | -1.273209 |
| 29            | 1             | 4.236686                | -0.776961 | 0.430591  |
| 30            | 1             | -1.077005               | -0.249307 | 1.826306  |
| 31            | 1             | -0.168932               | -2.378817 | 1.659786  |
| 32            | 1             | 0.458269                | -1.829898 | -1.348611 |
| 33            | 6             | 0.005805                | 0.955105  | -1.078886 |
| 34            | 1             | -0.499906               | 0.152616  | -1.610492 |
| 35            | 6             | -0.334066               | 3.100598  | 0.237133  |
| 36            | 1             | -0.814656               | 3.981708  | -0.204658 |
| 37            | 1             | -0.631564               | 3.088192  | 1.294034  |
| 38            | 1             | 0.745936                | 3.253885  | 0.191833  |
| 39            | 1             | -2.860575               | 2.515935  | -0.463967 |
| 40            | 1             | -2.561795               | 1.043640  | -1.379580 |

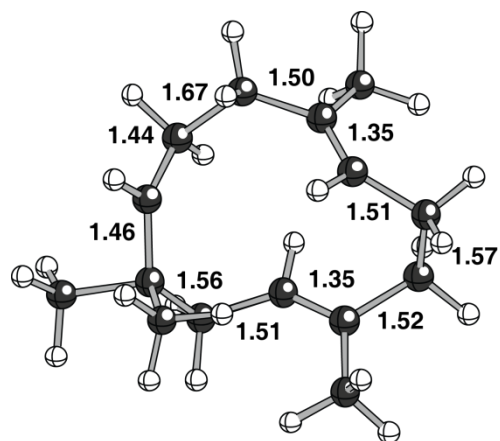

Structure TSA→B

B3LYP electronic energy: -586.3572043 H

B3LYP zero-point energy: 0.361589 H

mPW1PW91 electronic energy: -586.2210695 H

Imaginary frequency: -616.6836 cm<sup>-1</sup>

Coordinates (from last standard orientation):

| Center Number | Atomic Number | Coordinates (Angstroms) |           |           |
|---------------|---------------|-------------------------|-----------|-----------|
|               |               | X                       | Y         | Z         |
| 1             | 6             | 2.685396                | 0.428530  | 1.264900  |
| 2             | 1             | 3.468088                | 1.140639  | 0.990701  |
| 3             | 1             | 1.846191                | 0.993921  | 1.676503  |
| 4             | 1             | 3.085305                | -0.222967 | 2.048598  |
| 5             | 6             | 2.279702                | -0.387271 | 0.005599  |
| 6             | 6             | 1.217913                | -1.340583 | 0.495699  |
| 7             | 6             | 0.138118                | -1.906193 | -0.202301 |
| 8             | 1             | 1.133226                | -2.651583 | -0.096305 |
| 9             | 6             | -1.113575               | -2.438508 | 0.467400  |
| 10            | 1             | -1.462566               | -3.348310 | -0.026301 |
| 11            | 6             | -2.124988               | -1.289018 | 0.281105  |
| 12            | 6             | -1.860499               | -0.118417 | 0.885208  |
| 13            | 6             | -2.502713               | 1.226977  | 0.681612  |
| 14            | 1             | -3.569313               | 1.144066  | 0.453214  |
| 15            | 1             | -2.423818               | 1.807675  | 1.606614  |
| 16            | 6             | -1.812624               | 2.008887  | -0.493887 |
| 17            | 6             | -0.292723               | 1.968303  | -0.445290 |
| 18            | 6             | 1.789090                | 0.572127  | -1.149598 |
| 19            | 1             | 2.459581                | 1.437634  | -1.117597 |
| 20            | 1             | 1.988993                | 0.081032  | -2.108699 |
| 21            | 6             | -3.257987               | -1.555728 | -0.673793 |
| 22            | 1             | -3.862077               | -2.403435 | -0.328194 |
| 23            | 1             | -3.918396               | -0.693334 | -0.778190 |
| 24            | 1             | -2.889886               | -1.819121 | -1.674695 |
| 25            | 1             | 1.276418                | -1.621385 | 1.550898  |
| 26            | 6             | 3.517510                | -1.195856 | -0.475705 |
| 27            | 1             | 4.303002                | -0.492047 | -0.765605 |
| 28            | 1             | 3.278915                | -1.812857 | -1.348107 |
| 29            | 1             | 3.919018                | -1.838454 | 0.314192  |
| 30            | 1             | -0.981898               | -0.089109 | 1.533006  |
| 31            | 1             | -0.929871               | -2.667009 | 1.521899  |
| 32            | 1             | 0.063514                | -1.688491 | -1.265200 |
| 33            | 6             | 0.335386                | 0.992412  | -1.129794 |
| 34            | 1             | -0.311409               | 0.386006  | -1.760994 |
| 35            | 6             | 0.376767                | 3.009008  | 0.414711  |
| 36            | 1             | 0.064656                | 4.009606  | 0.092514  |
| 37            | 1             | 0.077070                | 2.920602  | 1.467612  |
| 38            | 1             | 1.466667                | 2.970420  | 0.366709  |
| 39            | 1             | -2.175535               | 3.042583  | -0.472884 |
| 40            | 1             | -2.154521               | 1.565886  | -1.434888 |

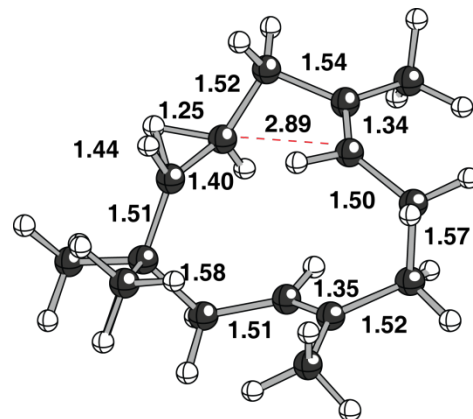

## Structure B

B3LYP electronic energy: -586.3909783 H

B3LYP zero-point energy: 0.364782 H

mPW1PW91 electronic energy: -586.2558043 H

Coordinates (from last standard orientation):

| Center<br>Number | Atomic<br>Number | Coordinates (Angstroms) |           |           |
|------------------|------------------|-------------------------|-----------|-----------|
|                  |                  | X                       | Y         | Z         |
| 1                | 6                | -3.651895               | 0.102213  | -0.657405 |
| 2                | 1                | -4.310590               | 0.791420  | -0.120607 |
| 3                | 1                | -3.502391               | 0.504410  | -1.665806 |
| 4                | 1                | -4.177402               | -0.854983 | -0.747703 |
| 5                | 6                | -2.311397               | -0.056295 | 0.094697  |
| 6                | 6                | -1.396903               | -0.940404 | -0.810200 |
| 7                | 6                | -0.325110               | -1.798711 | -0.233896 |
| 8                | 6                | 0.657185                | -2.530620 | -1.007293 |
| 9                | 1                | 0.821277                | -3.574121 | -0.737791 |
| 10               | 6                | 1.631692                | -1.609626 | -0.233194 |
| 11               | 6                | 1.873402                | -0.360529 | -0.730097 |
| 12               | 6                | 2.843409                | 0.648165  | -0.216798 |
| 13               | 1                | 3.683304                | 0.180660  | 0.303204  |
| 14               | 1                | 3.245914                | 1.198860  | -1.073399 |
| 15               | 6                | 2.135315                | 1.666072  | 0.761399  |
| 16               | 6                | 0.752119                | 2.036282  | 0.270496  |
| 17               | 6                | -1.722686               | 1.375601  | 0.309695  |
| 18               | 1                | -1.812581               | 1.931699  | -0.628707 |
| 19               | 1                | -2.379583               | 1.882808  | 1.029693  |
| 20               | 6                | 2.320885                | -2.207528 | 0.968508  |
| 21               | 1                | 3.188881                | -2.791436 | 0.639111  |
| 22               | 1                | 2.663590                | -1.449129 | 1.674207  |
| 23               | 1                | 1.663680                | -2.896422 | 1.507709  |
| 24               | 1                | -2.044708               | -1.739000 | -1.230398 |
| 25               | 6                | -2.587104               | -0.744690 | 1.446399  |
| 26               | 1                | -3.355000               | -0.190883 | 1.994396  |
| 27               | 1                | -1.706805               | -0.791895 | 2.096300  |
| 28               | 1                | -2.963612               | -1.765587 | 1.308700  |
| 29               | 1                | 1.283405                | -0.048027 | -1.589198 |
| 30               | 1                | 0.634188                | -2.376423 | -2.085094 |
| 31               | 1                | -0.426913               | -2.080808 | 0.811404  |
| 32               | 6                | -0.303187               | 1.385291  | 0.793496  |
| 33               | 1                | -0.101993               | 0.742692  | 1.651498  |
| 34               | 6                | 0.697728                | 3.039580  | -0.854906 |
| 35               | 1                | 1.107735                | 3.999077  | -0.516508 |
| 36               | 1                | 1.311626                | 2.730773  | -1.712105 |
| 37               | 1                | -0.313870               | 3.227786  | -1.217408 |
| 38               | 1                | 2.793522                | 2.536768  | 0.851298  |
| 39               | 1                | 2.069010                | 1.199075  | 1.748500  |
| 40               | 1                | -1.051397               | -0.396109 | -1.696700 |

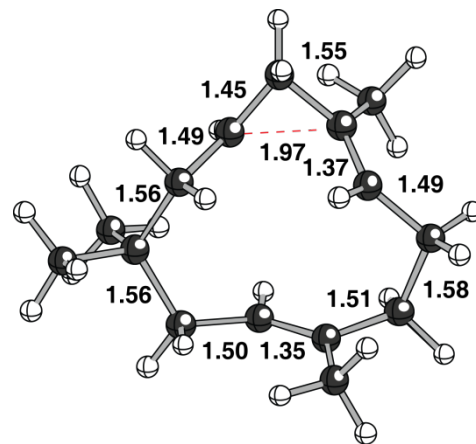



Structure TSB→C1

B3LYP electronic energy: -586.3816593 H

B3LYP zero-point energy: 0.363422 H

mPW1PW91 electronic energy: -586.059676 H

Imaginary frequency: -105.6230 cm<sup>-1</sup>

Coordinates (from last standard orientation):

| Center Number | Atomic Number | Coordinates (Angstroms) |           |           |
|---------------|---------------|-------------------------|-----------|-----------|
|               |               | X                       | Y         | Z         |
| 1             | 6             | -3.918111               | 0.294797  | -0.669089 |
| 2             | 1             | -4.496513               | 1.030688  | -0.101479 |
| 3             | 1             | -3.710114               | 0.721910  | -1.656184 |
| 4             | 1             | -4.552608               | -0.586604 | -0.806899 |
| 5             | 6             | -2.622208               | -0.061908 | 0.078604  |
| 6             | 6             | -1.766906               | -1.019794 | -0.797509 |
| 7             | 6             | -0.439504               | -1.334596 | -0.243915 |
| 8             | 6             | 0.713596                | -1.816982 | -1.058023 |
| 9             | 1             | 0.597100                | -2.918782 | -1.067437 |
| 10            | 6             | 2.019796                | -1.400985 | -0.394220 |
| 11            | 6             | 2.523091                | -0.231478 | -0.809506 |
| 12            | 6             | 3.246189                | 0.768514  | 0.047205  |
| 13            | 1             | 4.016691                | 0.337608  | 0.691499  |
| 14            | 1             | 3.726685                | 1.541823  | -0.557386 |
| 15            | 6             | 2.123688                | 1.382598  | 0.968015  |
| 16            | 6             | 0.795786                | 1.560702  | 0.271519  |
| 17            | 6             | -1.745813               | 1.208593  | 0.266819  |
| 18            | 1             | -1.740016               | 1.773305  | -0.669874 |
| 19            | 1             | -2.222914               | 1.855482  | 1.015828  |
| 20            | 6             | 2.468700                | -2.184399 | 0.809970  |
| 21            | 1             | 2.681004                | -3.222594 | 0.526556  |
| 22            | 1             | 3.379100                | -1.772701 | 1.249373  |
| 23            | 1             | 1.707702                | -2.226711 | 1.601170  |
| 24            | 1             | -2.287703               | -1.995895 | -0.848220 |
| 25            | 6             | -2.980104               | -0.703426 | 1.433797  |
| 26            | 1             | -3.599205               | -0.017435 | 2.020006  |
| 27            | 1             | -2.107602               | -0.948830 | 2.048092  |
| 28            | 1             | -3.557001               | -1.623126 | 1.290986  |
| 29            | 1             | 2.102788                | 0.188132  | -1.724000 |
| 30            | 1             | 0.643493                | -1.472769 | -2.093819 |
| 31            | 6             | -0.339811               | 0.897093  | 0.709313  |
| 32            | 1             | -0.236507               | 0.396581  | 1.671006  |
| 33            | 6             | 0.763781                | 2.567416  | -0.842968 |
| 34            | 1             | 0.434978                | 3.533410  | -0.432656 |
| 35            | 1             | 1.751880                | 2.728225  | -1.278768 |
| 36            | 1             | 0.062680                | 2.309423  | -1.639770 |
| 37            | 1             | 2.454685                | 2.367295  | 1.329827  |
| 38            | 1             | 1.995592                | 0.735587  | 1.839907  |
| 39            | 1             | -1.686009               | -0.658081 | -1.828705 |
| 40            | 1             | -0.411202               | -1.632809 | 0.800881  |

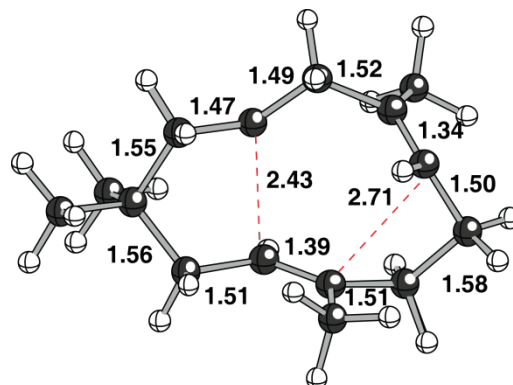

## Structure C1

B3LYP electronic energy: -586.4104289 H

B3LYP zero-point energy: 0.366171 H

mPW1PW91 electronic energy: -586.2884495 H

Coordinates (from last standard orientation):

| Center<br>Number | Atomic<br>Number | Coordinates (Angstroms) |           |           |
|------------------|------------------|-------------------------|-----------|-----------|
|                  |                  | X                       | Y         | Z         |
| 1                | 6                | 3.896209                | -0.297180 | -0.598995 |
| 2                | 1                | 4.421415                | -1.114877 | -0.093397 |
| 3                | 1                | 3.674210                | -0.621979 | -1.621795 |
| 4                | 1                | 4.586103                | 0.551525  | -0.656195 |
| 5                | 6                | 2.616808                | 0.080010  | 0.162408  |
| 6                | 6                | 1.809099                | 1.170606  | -0.592689 |
| 7                | 6                | 0.389601                | 1.055696  | -0.002787 |
| 8                | 6                | -0.726904               | 1.590090  | -1.005685 |
| 9                | 1                | -0.600612               | 2.658691  | -1.189983 |
| 10               | 6                | -1.982001               | 1.242180  | -0.350684 |
| 11               | 6                | -2.256391               | -0.181422 | -0.234386 |
| 12               | 6                | -2.822485               | -0.837028 | 1.065314  |
| 13               | 1                | -2.581788               | -0.261028 | 1.962815  |
| 14               | 1                | -3.887683               | -1.072335 | 1.071515  |
| 15               | 6                | -1.838477               | -2.013021 | 0.810710  |
| 16               | 6                | -1.024485               | -1.172313 | -0.230389 |
| 17               | 6                | 1.593815                | -1.087197 | 0.196907  |
| 18               | 1                | 1.630717                | -1.603895 | -0.766294 |
| 19               | 1                | 1.834322                | -1.827596 | 0.966605  |
| 20               | 6                | -2.841107               | 2.268073  | 0.263720  |
| 21               | 1                | -3.732304               | 1.866767  | 0.746120  |
| 22               | 1                | -2.248010               | 2.832776  | 1.001520  |
| 23               | 1                | -3.112713               | 3.014473  | -0.496379 |
| 24               | 1                | 2.231593                | 2.174109  | -0.479688 |
| 25               | 6                | 2.986107                | 0.543310  | 1.586208  |
| 26               | 1                | 3.531213                | -0.245987 | 2.114206  |
| 27               | 1                | 2.109606                | 0.794903  | 2.193810  |
| 28               | 1                | 3.632601                | 1.426815  | 1.553508  |
| 29               | 1                | -2.916091               | -0.412925 | -1.092485 |
| 30               | 1                | -0.606602               | 1.024792  | -1.936386 |
| 31               | 6                | 0.199111                | -0.443706 | 0.420810  |
| 32               | 1                | -0.004287               | -0.433610 | 1.498311  |
| 33               | 6                | -0.740482               | -1.894109 | -1.549091 |
| 34               | 1                | -0.113976               | -2.774605 | -1.380394 |
| 35               | 1                | -1.672680               | -2.247015 | -2.002190 |
| 36               | 1                | -0.227987               | -1.263804 | -2.283891 |
| 37               | 1                | -2.339072               | -2.862323 | 0.338010  |
| 38               | 1                | -1.280574               | -2.369319 | 1.680209  |
| 39               | 1                | 1.796099                | 0.933808  | -1.664190 |
| 40               | 1                | 0.325998                | 1.688694  | 0.888414  |

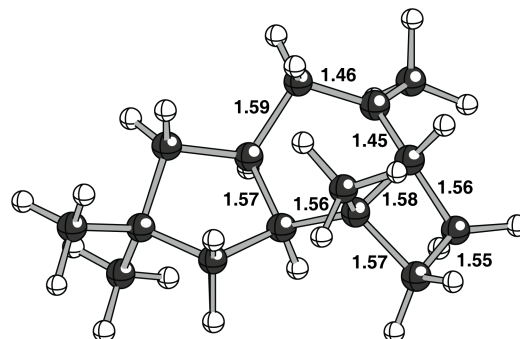

Structure C1 → protoilludene (2)

B3LYP electronic energy: -1230.2109293 H

B3LYP zero-point energy: 0.402858 H

mPW1PW91 electronic energy: -1230.0080479 H

Imaginary frequency: -177.2334 cm<sup>-1</sup>

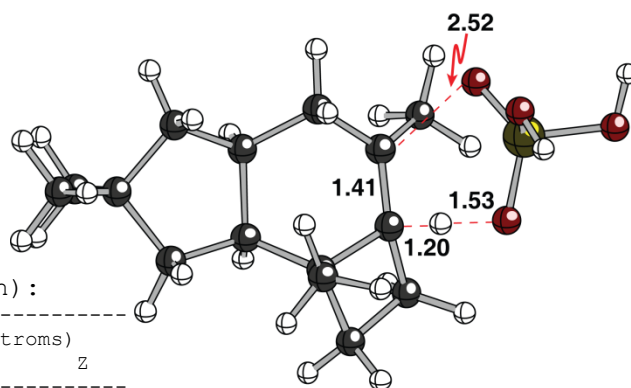

Coordinates (from last standard orientation):

| Center Number | Atomic Number | Coordinates (Angstroms) |           |           |
|---------------|---------------|-------------------------|-----------|-----------|
|               |               | X                       | Y         | Z         |
| 1             | 6             | -4.748037               | -1.582803 | -1.117344 |
| 2             | 1             | -5.533172               | -0.985531 | -1.596274 |
| 3             | 1             | -4.120191               | -2.008486 | -1.908567 |
| 4             | 1             | -5.237492               | -2.412728 | -0.593761 |
| 5             | 6             | -3.917446               | -0.728922 | -0.147978 |
| 6             | 6             | -2.738714               | -1.526898 | 0.463973  |
| 7             | 6             | -1.756945               | -0.454303 | 0.969051  |
| 8             | 6             | -0.289993               | -0.949363 | 1.126826  |
| 9             | 1             | -0.192442               | -1.662495 | 1.949106  |
| 10            | 6             | 0.575277                | 0.248422  | 1.321432  |
| 11            | 6             | 0.567891                | 1.170895  | 0.250654  |
| 12            | 6             | 0.542043                | 2.719996  | 0.355335  |
| 13            | 1             | 0.081074                | 3.088429  | 1.277880  |
| 14            | 1             | 1.498887                | 3.226730  | 0.210720  |
| 15            | 6             | -0.420525               | 2.717703  | -0.869141 |
| 16            | 6             | -0.619261               | 1.165948  | -0.770714 |
| 17            | 6             | -3.165316               | 0.417724  | -0.876433 |
| 18            | 1             | -2.853736               | 0.052733  | -1.859478 |
| 19            | 1             | -3.810064               | 1.286585  | -1.051798 |
| 20            | 6             | 1.166902                | 0.557072  | 2.646432  |
| 21            | 1             | 0.346571                | 0.898052  | 3.300257  |
| 22            | 1             | 1.608714                | -0.335901 | 3.091270  |
| 23            | 1             | 1.908740                | 1.356055  | 2.590995  |
| 24            | 1             | -3.056694               | -2.219061 | 1.252649  |
| 25            | 6             | -4.842553               | -0.171885 | 0.953771  |
| 26            | 1             | -5.651478               | 0.421605  | 0.512035  |
| 27            | 1             | -4.310599               | 0.474472  | 1.660016  |
| 28            | 1             | -5.301497               | -0.985845 | 1.527353  |
| 29            | 1             | 1.577805                | 0.885766  | -0.322594 |
| 30            | 1             | 0.027436                | -1.457735 | 0.211502  |
| 31            | 6             | -1.925526               | 0.768356  | -0.008011 |
| 32            | 1             | -2.172948               | 1.637203  | 0.614751  |
| 33            | 6             | -0.379591               | 0.419231  | -2.087408 |
| 34            | 1             | -1.082143               | 0.752185  | -2.859138 |
| 35            | 1             | 0.634805                | 0.610252  | -2.447268 |
| 36            | 1             | -0.490381               | -0.666023 | -1.982525 |
| 37            | 1             | 0.092911                | 3.003149  | -1.791719 |
| 38            | 1             | -1.328025               | 3.321218  | -0.768304 |
| 39            | 1             | -2.260494               | -2.126277 | -0.322846 |
| 40            | 1             | -2.088262               | -0.133390 | 1.964481  |
| 41            | 15            | 3.421873                | -0.656601 | -0.278642 |
| 42            | 8             | 2.619439                | -1.167819 | 0.894069  |
| 43            | 8             | 4.946642                | -0.255467 | 0.168138  |
| 44            | 8             | 3.645518                | -1.909786 | -1.310380 |
| 45            | 8             | 2.881501                | 0.549127  | -1.047919 |
| 46            | 1             | 4.038248                | -1.606454 | -2.141760 |
| 47            | 1             | 5.312290                | -0.920983 | 0.768710  |

Protoilludene (2)

B3LYP electronic energy: -586.0667102 H

B3LYP zero-point energy: 0.355483 H

mPW1PW91 electronic energy: -585.9763966 H

Coordinates (from last standard orientation):

| Center Number | Atomic Number | Coordinates (Angstroms) |           |           |
|---------------|---------------|-------------------------|-----------|-----------|
|               |               | X                       | Y         | Z         |
| 1             | 6             | -3.913011               | -0.185094 | 0.812772  |
| 2             | 1             | -4.465598               | -1.077744 | 0.494764  |
| 3             | 1             | -3.614000               | -0.330636 | 1.857601  |
| 4             | 1             | -4.607907               | 0.662997  | 0.778108  |
| 5             | 6             | -2.691469               | 0.060456  | -0.084584 |
| 6             | 6             | -1.842758               | 1.263404  | 0.395549  |
| 7             | 6             | -0.441102               | 1.067880  | -0.220592 |
| 8             | 6             | 0.707450                | 1.731193  | 0.578221  |
| 9             | 1             | 0.649574                | 2.819839  | 0.451564  |
| 10            | 6             | 2.073120                | 1.218675  | 0.141097  |
| 11            | 6             | 2.158622                | -0.104867 | -0.009486 |
| 12            | 6             | 3.100836                | -1.148367 | -0.579595 |
| 13            | 1             | 3.652909                | -0.879780 | -1.486963 |
| 14            | 1             | 3.819282                | -1.545476 | 0.148632  |
| 15            | 6             | 1.848134                | -2.071361 | -0.759661 |
| 16            | 6             | 1.005319                | -1.088458 | 0.135831  |
| 17            | 6             | -1.655235               | -1.088574 | 0.010400  |
| 18            | 1             | -1.597625               | -1.407750 | 1.056925  |
| 19            | 1             | -1.950669               | -1.968271 | -0.574816 |
| 20            | 6             | 3.189757                | 2.195183  | -0.108258 |
| 21            | 1             | 4.102419                | 1.691900  | -0.441767 |
| 22            | 1             | 2.908008                | 2.934530  | -0.870723 |
| 23            | 1             | 3.431741                | 2.761311  | 0.801727  |
| 24            | 1             | -2.292916               | 2.228567  | 0.132082  |
| 25            | 6             | -3.164440               | 0.263151  | -1.538778 |
| 26            | 1             | -3.710317               | -0.618593 | -1.895266 |
| 27            | 1             | -2.329493               | 0.434979  | -2.225831 |
| 28            | 1             | -3.838111               | 1.125228  | -1.613050 |
| 29            | 1             | 0.564797                | 1.547711  | 1.653591  |
| 30            | 6             | -0.303927               | -0.491697 | -0.454714 |
| 31            | 1             | -0.225143               | -0.637609 | -1.537897 |
| 32            | 6             | 0.878520                | -1.625060 | 1.573554  |
| 33            | 1             | 0.242837                | -2.517036 | 1.613072  |
| 34            | 1             | 1.863332                | -1.904603 | 1.963610  |
| 35            | 1             | 0.456135                | -0.877216 | 2.253494  |
| 36            | 1             | 1.942293                | -3.099573 | -0.394919 |
| 37            | 1             | 1.498319                | -2.094235 | -1.796422 |
| 38            | 1             | -1.770386               | 1.232000  | 1.492286  |
| 39            | 1             | -0.428387               | 1.540685  | -1.210335 |

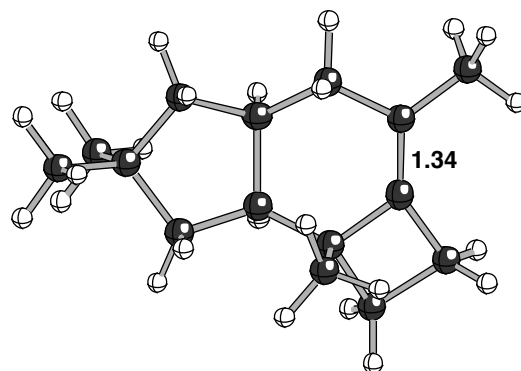

Structure TSC2→C3

B3LYP electronic energy: -586.4082177 H

B3LYP zero-point energy: 0.366745 H

mPW1PW91 electronic energy: -586.2856326 H

Imaginary frequency: -56.3246 cm<sup>-1</sup>

Coordinates (from last standard orientation):

| Center Number | Atomic Number | Coordinates (Angstroms) |           |           |
|---------------|---------------|-------------------------|-----------|-----------|
|               |               | X                       | Y         | Z         |
| 1             | 6             | 3.912814                | -0.405615 | -0.637052 |
| 2             | 1             | 4.405099                | -1.258939 | -0.157883 |
| 3             | 1             | 3.677090                | -0.689297 | -1.668968 |
| 4             | 1             | 4.636553                | 0.415773  | -0.669482 |
| 5             | 6             | 2.650450                | 0.000086  | 0.137796  |
| 6             | 6             | 1.894579                | 1.155285  | -0.574038 |
| 7             | 6             | 0.453770                | 1.068386  | -0.021428 |
| 8             | 6             | -0.612045               | 1.573852  | -1.097554 |
| 9             | 1             | -0.435273               | 2.631577  | -1.302430 |
| 10            | 6             | -1.864522               | 1.301162  | -0.404230 |
| 11            | 6             | -2.297635               | -0.076048 | -0.454028 |
| 12            | 6             | -3.216716               | -0.750495 | 0.580922  |
| 13            | 1             | -3.628651               | -0.100014 | 1.355453  |
| 14            | 1             | -4.047694               | -1.289312 | 0.121768  |
| 15            | 6             | -2.042057               | -1.658660 | 1.040345  |
| 16            | 6             | -1.074767               | -1.123557 | -0.068859 |
| 17            | 6             | 1.574277                | -1.115283 | 0.117152  |
| 18            | 1             | 1.556497                | -1.551672 | -0.886138 |
| 19            | 1             | 1.795712                | -1.926913 | 0.818124  |
| 20            | 6             | -2.515815               | 2.329780  | 0.430789  |
| 21            | 1             | -3.513183               | 2.515437  | -0.002442 |
| 22            | 1             | -2.716074               | 1.964597  | 1.444607  |
| 23            | 1             | -1.967850               | 3.271999  | 0.462969  |
| 24            | 1             | 2.346587                | 2.136885  | -0.401288 |
| 25            | 6             | 3.036736                | 0.390904  | 1.578326  |
| 26            | 1             | 3.510227                | -0.453221 | 2.090424  |
| 27            | 1             | 3.752590                | 1.219535  | 1.575568  |
| 28            | 1             | -2.550106               | -0.285499 | -1.503465 |
| 29            | 1             | -0.486323               | 0.972209  | -2.000984 |
| 30            | 6             | 0.226076                | -0.418414 | 0.437312  |
| 31            | 1             | 0.125371                | -0.378902 | 1.527025  |
| 32            | 6             | -0.873996               | -2.138359 | -1.194830 |
| 33            | 1             | -0.389825               | -1.703648 | -2.075557 |
| 34            | 1             | -0.252328               | -2.968535 | -0.845391 |
| 35            | 1             | -1.833008               | -2.561561 | -1.510002 |
| 36            | 1             | -2.236631               | -2.732158 | 0.977679  |
| 37            | 1             | -1.696477               | -1.427354 | 2.051287  |
| 38            | 1             | 1.898806                | 0.974109  | -1.655928 |
| 39            | 1             | 0.365220                | 1.726826  | 0.848498  |
| 40            | 1             | 2.176765                | 0.699918  | 2.182812  |

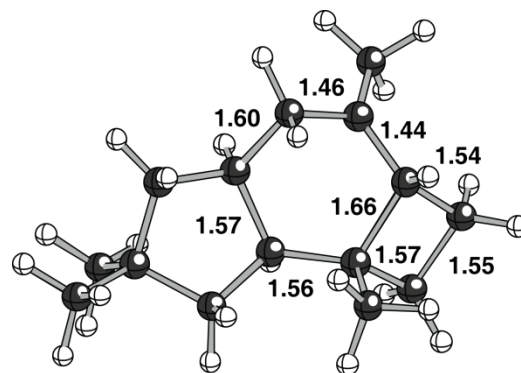

## Structure C2

B3LYP electronic energy: -586.4109987 H

B3LYP zero-point energy: 0.366456 H

mPW1PW91 electronic energy: -586.289115 H

Coordinates (from last standard orientation):

| Center Number | Atomic Number | Coordinates (Angstroms) |           |           |
|---------------|---------------|-------------------------|-----------|-----------|
|               |               | X                       | Y         | Z         |
| 1             | 6             | 3.646390                | 0.364914  | -1.085006 |
| 2             | 1             | 4.135460                | -0.538319 | -1.465361 |
| 3             | 1             | 3.157159                | 0.862144  | -1.930846 |
| 4             | 1             | 4.430819                | 1.031883  | -0.711622 |
| 5             | 6             | 2.641369                | 0.018002  | 0.025856  |
| 6             | 6             | 1.889144                | 1.294751  | 0.544237  |
| 7             | 6             | 0.375795                | 0.945734  | 0.571548  |
| 8             | 6             | -0.352855               | 1.655144  | -0.688287 |
| 9             | 1             | -0.146467               | 2.725440  | -0.679967 |
| 10            | 6             | -1.742217               | 1.322717  | -0.443067 |
| 11            | 6             | -2.139819               | -0.061089 | -0.660214 |
| 12            | 6             | -3.264748               | -0.676449 | 0.203271  |
| 13            | 1             | -3.969505               | 0.005182  | 0.682491  |
| 14            | 1             | -3.838869               | -1.418483 | -0.353701 |
| 15            | 6             | -2.173268               | -1.312808 | 1.104811  |
| 16            | 6             | -1.094274               | -1.138038 | -0.010489 |
| 17            | 6             | 1.502045                | -0.896346 | -0.498417 |
| 18            | 1             | 1.280726                | -0.655859 | -1.547010 |
| 19            | 1             | 1.784560                | -1.952391 | -0.473820 |
| 20            | 6             | -2.650425               | 2.308394  | 0.182317  |
| 21            | 1             | -3.636437               | 2.265423  | -0.298619 |
| 22            | 1             | -2.837309               | 2.022932  | 1.228933  |
| 23            | 1             | -2.259057               | 3.325505  | 0.157178  |
| 24            | 1             | 2.220255                | 1.570572  | 1.550439  |
| 25            | 6             | 3.386618                | -0.663775 | 1.191502  |
| 26            | 1             | 3.892617                | -1.572863 | 0.849477  |
| 27            | 1             | 2.713450                | -0.943695 | 2.009981  |
| 28            | 1             | 4.148023                | 0.004637  | 1.607081  |
| 29            | 1             | -2.195148               | -0.203344 | -1.752243 |
| 30            | 1             | 0.060374                | 1.182430  | -1.583083 |
| 31            | 6             | 0.286597                | -0.586925 | 0.401492  |
| 32            | 1             | 0.493180                | -1.023048 | 1.389887  |
| 33            | 6             | -1.006095               | -2.397313 | -0.877604 |
| 34            | 1             | -0.467572               | -2.221567 | -1.812571 |
| 35            | 1             | -0.478234               | -3.183468 | -0.327143 |
| 36            | 1             | -1.998641               | -2.784921 | -1.124868 |
| 37            | 1             | -2.341943               | -2.338986 | 1.441563  |
| 38            | 1             | -1.958772               | -0.685441 | 1.977292  |
| 39            | 1             | 2.087179                | 2.160997  | -0.094405 |
| 40            | 1             | -0.101392               | 1.303762  | 1.489230  |

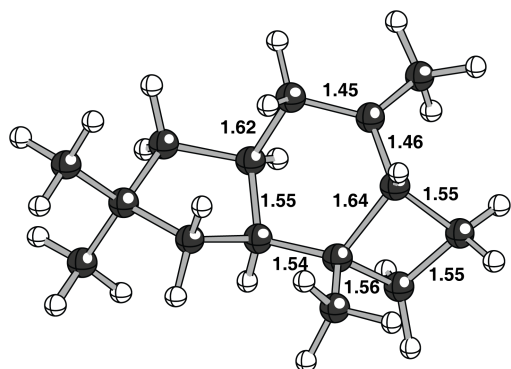

Structure TSC2→protoilludene (2)

B3LYP electronic energy: -1230.211706 H

B3LYP zero-point energy: 0.403588 H

mPW1PW91 electronic energy: -1230.008554 H

Imaginary frequency: -130.9728 cm<sup>-1</sup>

Coordinates (from last standard orientation):

| Center Number | Atomic Number | Coordinates (Angstroms) |           |           |
|---------------|---------------|-------------------------|-----------|-----------|
|               |               | X                       | Y         | Z         |
| 1             | 6             | -3.063609               | -2.766450 | 0.111437  |
| 2             | 1             | -3.144454               | -3.264773 | -0.861923 |
| 3             | 1             | -2.078475               | -3.007132 | 0.526425  |
| 4             | 1             | -3.822804               | -3.201829 | 0.772356  |
| 5             | 6             | -3.258359               | -1.247096 | -0.029621 |
| 6             | 6             | -3.061119               | -0.501699 | 1.339542  |
| 7             | 6             | -1.923031               | 0.527758  | 1.140097  |
| 8             | 6             | -0.560143               | -0.046640 | 1.614823  |
| 9             | 1             | -0.576471               | -0.269810 | 2.686628  |
| 10            | 6             | 0.562788                | 0.874243  | 1.290492  |
| 11            | 6             | 0.613723                | 1.485078  | 0.002718  |
| 12            | 6             | 0.791747                | 3.036178  | -0.112393 |
| 13            | 1             | 0.999989                | 3.582729  | 0.810622  |
| 14            | 1             | 1.543551                | 3.305295  | -0.857171 |
| 15            | 6             | -0.664945               | 3.094381  | -0.641775 |
| 16            | 6             | -0.668902               | 1.548324  | -0.898679 |
| 17            | 6             | -2.180902               | -0.619287 | -0.960679 |
| 18            | 1             | -1.264040               | -1.221430 | -0.940842 |
| 19            | 1             | -2.513694               | -0.591189 | -2.003004 |
| 20            | 6             | 1.471289                | 1.319740  | 2.378285  |
| 21            | 1             | 1.741607                | 0.477473  | 3.017653  |
| 22            | 1             | 2.370390                | 1.807728  | 1.998452  |
| 23            | 1             | 0.914879                | 2.047509  | 2.992501  |
| 24            | 1             | -3.984687               | 0.012913  | 1.627677  |
| 25            | 6             | -4.670791               | -0.969068 | -0.582511 |
| 26            | 1             | -4.823901               | -1.475092 | -1.542998 |
| 27            | 1             | -4.840166               | 0.102927  | -0.737450 |
| 28            | 1             | -5.440052               | -1.328232 | 0.111566  |
| 29            | 1             | 1.511875                | 0.936494  | -0.506700 |
| 30            | 1             | -0.348072               | -0.994640 | 1.107468  |
| 31            | 6             | -1.909767               | 0.787720  | -0.386225 |
| 32            | 1             | -2.782278               | 1.414921  | -0.625768 |
| 33            | 6             | -0.359633               | 1.250383  | -2.371604 |
| 34            | 1             | -0.106194               | 0.199125  | -2.528908 |
| 35            | 1             | -1.224369               | 1.499478  | -2.998535 |
| 36            | 1             | 0.492867                | 1.841189  | -2.721079 |
| 37            | 1             | -0.848094               | 3.723596  | -1.519021 |
| 38            | 1             | -1.366280               | 3.376235  | 0.151961  |
| 39            | 1             | -2.828924               | -1.201485 | 2.150541  |
| 40            | 1             | -2.124964               | 1.447399  | 1.704244  |
| 41            | 15            | 2.923478                | -1.045112 | -0.236409 |
| 42            | 8             | 2.043072                | -1.126980 | 0.992901  |
| 43            | 8             | 4.510418                | -1.077779 | 0.175782  |
| 44            | 8             | 2.719140                | -2.445601 | -1.066786 |
| 45            | 8             | 2.748438                | 0.144074  | -1.171488 |
| 46            | 1             | 3.141460                | -2.391226 | -1.936326 |
| 47            | 1             | 4.670526                | -1.742586 | 0.861066  |

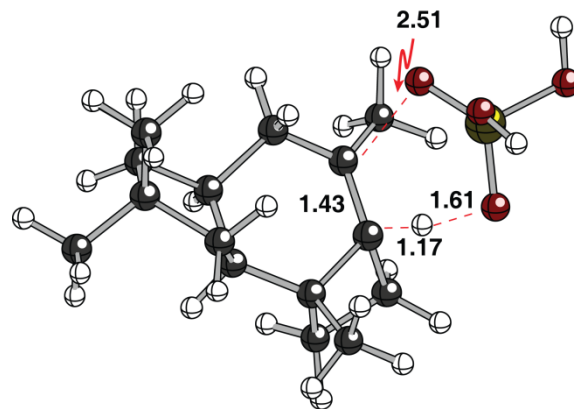

Structure TSC2→C3

B3LYP electronic energy: -586.4109976 H

B3LYP zero-point energy: 0.366338 H

mPW1PW91 electronic energy: -586.2891035 H

Imaginary frequency: -10.0160 cm<sup>-1</sup>

Coordinates (from last standard orientation):

| Center Number | Atomic Number | Coordinates (Angstroms) |           |           |
|---------------|---------------|-------------------------|-----------|-----------|
|               |               | X                       | Y         | Z         |
| 1             | 6             | 3.627040                | 0.402432  | -1.095084 |
| 2             | 1             | 4.113276                | -0.488504 | -1.506689 |
| 3             | 1             | 3.122638                | 0.919492  | -1.919927 |
| 4             | 1             | 4.414738                | 1.062856  | -0.716990 |
| 5             | 6             | 2.640784                | 0.022842  | 0.022034  |
| 6             | 6             | 1.887445                | 1.282040  | 0.581342  |
| 7             | 6             | 0.374752                | 0.933284  | 0.595364  |
| 8             | 6             | -0.348115               | 1.659369  | -0.655738 |
| 9             | 1             | -0.143962               | 2.729972  | -0.635322 |
| 10            | 6             | -1.742598               | 1.325115  | -0.438433 |
| 11            | 6             | -2.133909               | -0.061822 | -0.651315 |
| 12            | 6             | -3.260993               | -0.676250 | 0.212018  |
| 13            | 1             | -3.956721               | 0.007229  | 0.701619  |
| 14            | 1             | -3.843952               | -1.409183 | -0.347776 |
| 15            | 6             | -2.168509               | -1.326316 | 1.102337  |
| 16            | 6             | -1.092162               | -1.142471 | -0.014634 |
| 17            | 6             | 1.501267                | -0.889126 | -0.507347 |
| 18            | 1             | 1.273382                | -0.637719 | -1.551963 |
| 19            | 1             | 1.787766                | -1.944334 | -0.497279 |
| 20            | 6             | -2.669302               | 2.314458  | 0.152020  |
| 21            | 1             | -3.668604               | 2.216530  | -0.288935 |
| 22            | 1             | -2.807302               | 2.081001  | 1.220260  |
| 23            | 1             | -2.308109               | 3.339636  | 0.065667  |
| 24            | 1             | 2.216136                | 1.521602  | 1.597614  |
| 25            | 6             | 3.407467                | -0.680378 | 1.160674  |
| 26            | 1             | 3.918027                | -1.575443 | 0.789597  |
| 27            | 1             | 4.167491                | -0.015245 | 1.584036  |
| 28            | 1             | -2.199742               | -0.195820 | -1.744674 |
| 29            | 1             | 0.073080                | 1.199585  | -1.554135 |
| 30            | 6             | 0.288966                | -0.596338 | 0.402317  |
| 31            | 1             | 0.500123                | -1.047713 | 1.382953  |
| 32            | 6             | -1.004565               | -2.396280 | -0.890048 |
| 33            | 1             | -0.467481               | -2.214019 | -1.824661 |
| 34            | 1             | -0.476020               | -3.186427 | -0.346120 |
| 35            | 1             | -1.997633               | -2.781921 | -1.138767 |
| 36            | 1             | -2.339897               | -2.355813 | 1.427290  |
| 37            | 1             | -1.949642               | -0.709659 | 1.981279  |
| 38            | 1             | 2.087596                | 2.170575  | -0.025324 |
| 39            | 1             | -0.107436               | 1.277913  | 1.515669  |
| 40            | 1             | 2.746837                | -0.987947 | 1.979536  |

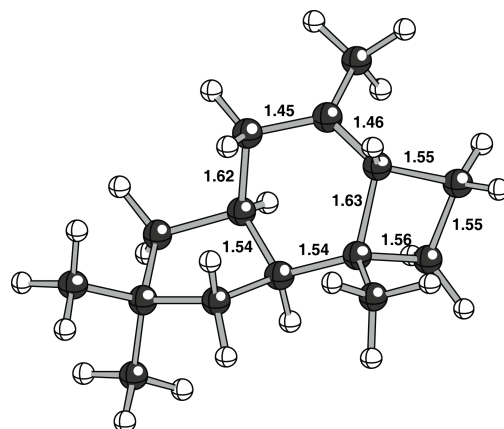



### Structure C3

B3LYP electronic energy: -586.417119 H

B3LYP zero-point energy: 0.366927 H

mPW1PW91 electronic energy: -586.295644 H

Coordinates (from last standard orientation):

| Center Number | Atomic Number | Coordinates (Angstroms) |           |           |
|---------------|---------------|-------------------------|-----------|-----------|
|               |               | X                       | Y         | Z         |
| 1             | 6             | 3.150603                | 1.185791  | -0.958695 |
| 2             | 1             | 3.535442                | 0.763650  | -1.893570 |
| 3             | 1             | 2.426104                | 1.966472  | -1.223566 |
| 4             | 1             | 3.986563                | 1.673805  | -0.446171 |
| 5             | 6             | 2.522772                | 0.091266  | -0.077176 |
| 6             | 6             | 1.869961                | 0.686037  | 1.224896  |
| 7             | 6             | 0.350118                | 0.431334  | 1.120393  |
| 8             | 6             | -0.368867               | 1.610403  | 0.430581  |
| 9             | 1             | -0.502413               | 2.462293  | 1.108823  |
| 10            | 6             | -1.625438               | 1.316426  | -0.297361 |
| 11            | 6             | -2.015338               | -0.023421 | -0.565239 |
| 12            | 6             | -2.874149               | -0.256714 | 0.855984  |
| 13            | 1             | -2.692361               | 0.477382  | 1.643320  |
| 14            | 1             | -3.939534               | -0.284135 | 0.627930  |
| 15            | 6             | -2.100350               | -1.580095 | 1.007245  |
| 16            | 6             | -1.140514               | -1.256071 | -0.187619 |
| 17            | 6             | 1.338499                | -0.617798 | -0.810397 |
| 18            | 1             | 0.936050                | 0.027254  | -1.605049 |
| 19            | 1             | 1.660717                | -1.541759 | -1.298199 |
| 20            | 6             | -2.480971               | 2.443876  | -0.752724 |
| 21            | 1             | -3.472015               | 2.120604  | -1.077293 |
| 22            | 1             | -2.560189               | 3.235460  | -0.002001 |
| 23            | 1             | -1.980540               | 2.892929  | -1.625471 |
| 24            | 1             | 2.258970                | 0.172771  | 2.109845  |
| 25            | 6             | 3.609409                | -0.935536 | 0.297900  |
| 26            | 1             | 4.084499                | -1.349752 | -0.597969 |
| 27            | 1             | 4.392799                | -0.469754 | 0.905703  |
| 28            | 1             | -2.702175               | -0.148902 | -1.403801 |
| 29            | 1             | 0.268528                | 2.019173  | -0.377128 |
| 30            | 6             | 0.273386                | -0.865479 | 0.278687  |
| 31            | 1             | 0.627738                | -1.687468 | 0.915668  |
| 32            | 6             | -1.136769               | -2.331789 | -1.274902 |
| 33            | 1             | -0.621601               | -1.994548 | -2.179076 |
| 34            | 1             | -0.629838               | -3.232028 | -0.911371 |
| 35            | 1             | -2.156724               | -2.617227 | -1.553969 |
| 36            | 1             | -2.737684               | -2.445635 | 0.810873  |
| 37            | 1             | -1.617353               | -1.709212 | 1.978681  |
| 38            | 1             | 2.103086                | 1.748821  | 1.356032  |
| 39            | 1             | -0.097868               | 0.300471  | 2.112509  |
| 40            | 1             | 3.195704                | -1.770043 | 0.875823  |

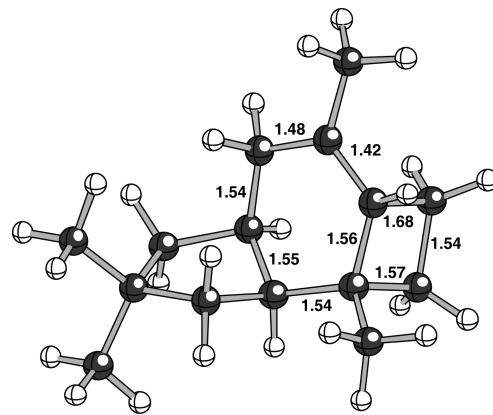

Structure TSC3→C4

B3LYP electronic energy: -586.4155732 H

B3LYP zero-point energy: 0.366225 H

mPW1PW91 electronic energy: -586.2931957 H

Imaginary frequency: -56.7561 cm<sup>-1</sup>

Coordinates (from last standard orientation):

| Center Number | Atomic Number | Coordinates (Angstroms) |           |           |
|---------------|---------------|-------------------------|-----------|-----------|
|               |               | X                       | Y         | Z         |
| 1             | 6             | -3.151828               | 1.111276  | 0.663199  |
| 2             | 1             | -3.473235               | 0.915589  | 1.692187  |
| 3             | 1             | -2.507543               | 1.999137  | 0.680873  |
| 4             | 1             | -4.044419               | 1.363316  | 0.080850  |
| 5             | 6             | -2.431091               | -0.111857 | 0.069522  |
| 6             | 6             | -1.873321               | 0.172310  | -1.373522 |
| 7             | 6             | -0.333480               | 0.097600  | -1.281926 |
| 8             | 6             | 0.271187                | 1.497393  | -0.920239 |
| 9             | 1             | 0.740070                | 1.917572  | -1.830391 |
| 10            | 6             | 1.339185                | 1.510815  | 0.097467  |
| 11            | 6             | 2.187116                | 0.373343  | 0.247047  |
| 12            | 6             | 2.856465                | -0.272640 | -1.040320 |
| 13            | 1             | 2.499074                | 0.183347  | -1.964664 |
| 14            | 1             | 3.942247                | -0.172786 | -0.994063 |
| 15            | 6             | 2.274076                | -1.664885 | -0.755264 |
| 16            | 6             | 1.340670                | -1.078501 | 0.336389  |
| 17            | 6             | -1.161640               | -0.480450 | 0.901789  |
| 18            | 1             | -0.808719               | 0.395803  | 1.466784  |
| 19            | 1             | -1.369998               | -1.257671 | 1.642631  |
| 20            | 6             | 1.466199                | 2.685956  | 0.990393  |
| 21            | 1             | 2.472519                | 2.801637  | 1.398078  |
| 22            | 1             | 1.130055                | 3.607162  | 0.504756  |
| 23            | 1             | 0.783734                | 2.526723  | 1.843029  |
| 24            | 1             | -2.225103               | -0.593784 | -2.072176 |
| 25            | 6             | -3.408782               | -1.302859 | 0.031051  |
| 26            | 1             | -3.815219               | -1.511334 | 1.026553  |
| 27            | 1             | -4.251979               | -1.092304 | -0.635652 |
| 28            | 1             | 2.894811                | 0.474148  | 1.070389  |
| 29            | 1             | -0.497490               | 2.228959  | -0.650202 |
| 30            | 6             | -0.106280               | -0.914671 | -0.131504 |
| 31            | 1             | -0.393398               | -1.902678 | -0.520951 |
| 32            | 6             | 1.496029                | -1.693762 | 1.720381  |
| 33            | 1             | 0.989509                | -1.113040 | 2.495973  |
| 34            | 1             | 1.058691                | -2.700156 | 1.709699  |
| 35            | 1             | 2.549627                | -1.798572 | 1.995237  |
| 36            | 1             | 3.008870                | -2.363457 | -0.348381 |
| 37            | 1             | 1.766527                | -2.149641 | -1.592629 |
| 38            | 1             | -2.217610               | 1.133013  | -1.771539 |
| 39            | 1             | 0.103833                | -0.249734 | -2.221849 |
| 40            | 1             | -2.921876               | -2.215654 | -0.331324 |

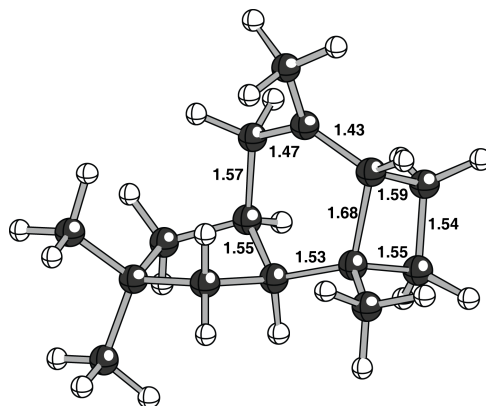

### Structure C4

B3LYP electronic energy: -586.417315 H

B3LYP zero-point energy: 0.367208 H

mPW1PW91 electronic energy: -586.2930655 H

Coordinates (from last standard orientation):

| Center Number | Atomic Number | Coordinates (Angstroms) |           |           |
|---------------|---------------|-------------------------|-----------|-----------|
|               |               | X                       | Y         | Z         |
| 1             | 6             | -3.247250               | 1.097204  | 0.559197  |
| 2             | 1             | -3.597287               | 0.936258  | 1.584829  |
| 3             | 1             | -2.640878               | 2.010801  | 0.552106  |
| 4             | 1             | -4.127793               | 1.280040  | -0.065536 |
| 5             | 6             | -2.454547               | -0.117902 | 0.048316  |
| 6             | 6             | -1.863420               | 0.126026  | -1.389372 |
| 7             | 6             | -0.325309               | 0.041959  | -1.276793 |
| 8             | 6             | 0.333494                | 1.454977  | -1.039327 |
| 9             | 1             | 0.768023                | 1.785165  | -1.993347 |
| 10            | 6             | 1.406161                | 1.456851  | 0.000891  |
| 11            | 6             | 2.443445                | 0.536370  | -0.023829 |
| 12            | 6             | 2.839042                | -0.382007 | -1.176159 |
| 13            | 1             | 2.366707                | -0.097103 | -2.117685 |
| 14            | 1             | 3.920169                | -0.397748 | -1.327116 |
| 15            | 6             | 2.259860                | -1.681095 | -0.585342 |
| 16            | 6             | 1.306982                | -1.033052 | 0.440080  |
| 17            | 6             | -1.201469               | -0.388222 | 0.939850  |
| 18            | 1             | -0.884084               | 0.534223  | 1.440908  |
| 19            | 1             | -1.411356               | -1.118668 | 1.726954  |
| 20            | 6             | 1.313850                | 2.449949  | 1.114368  |
| 21            | 1             | 2.018069                | 2.252672  | 1.925271  |
| 22            | 1             | 1.562699                | 3.436524  | 0.693615  |
| 23            | 1             | 0.298217                | 2.538867  | 1.510751  |
| 24            | 1             | -2.220488               | -0.645206 | -2.079517 |
| 25            | 6             | -3.375650               | -1.354285 | 0.034896  |
| 26            | 1             | -3.799106               | -1.540904 | 1.027602  |
| 27            | 1             | -4.208756               | -1.208565 | -0.660796 |
| 28            | 1             | 3.174857                | 0.615373  | 0.778681  |
| 29            | 1             | -0.429760               | 2.188821  | -0.772036 |
| 30            | 6             | -0.115187               | -0.866106 | -0.038322 |
| 31            | 1             | -0.375315               | -1.889281 | -0.362699 |
| 32            | 6             | 1.522109                | -1.354412 | 1.891393  |
| 33            | 1             | 1.010988                | -0.661426 | 2.562779  |
| 34            | 1             | 1.094222                | -2.353817 | 2.065787  |
| 35            | 1             | 2.581103                | -1.408543 | 2.152549  |
| 36            | 1             | 3.022728                | -2.277269 | -0.077929 |
| 37            | 1             | 1.738167                | -2.323999 | -1.300623 |
| 38            | 1             | -2.182842               | 1.085417  | -1.808753 |
| 39            | 1             | 0.110200                | -0.400035 | -2.176329 |
| 40            | 1             | -2.841147               | -2.259137 | -0.278556 |

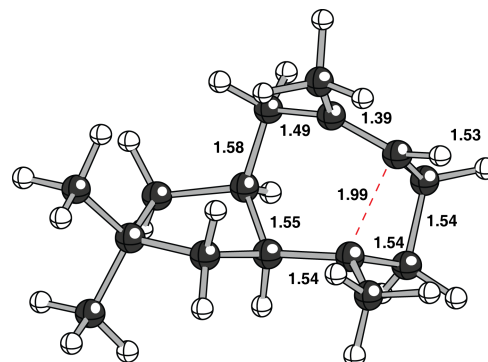

Structure C4→D'

B3LYP electronic energy: -586.4109204 H

B3LYP zero-point energy: 0.365872 H

mPW1PW91 electronic energy: -586.281245 H

Imaginary frequency: -50.0778 cm<sup>-1</sup>

Coordinates (from last standard orientation):

| Center Number | Atomic Number | Coordinates (Angstroms) |           |           |
|---------------|---------------|-------------------------|-----------|-----------|
|               |               | X                       | Y         | Z         |
| 1             | 6             | -3.591960               | 1.063297  | 0.793556  |
| 2             | 1             | -4.173784               | 0.484032  | 1.518737  |
| 3             | 1             | -3.046927               | 1.840744  | 1.340731  |
| 4             | 1             | -4.302618               | 1.560176  | 0.124940  |
| 5             | 6             | -2.637721               | 0.157807  | -0.000984 |
| 6             | 6             | -1.759693               | 0.972108  | -1.006112 |
| 7             | 6             | -0.289206               | 0.462928  | -0.949504 |
| 8             | 6             | 0.653174                | 1.538803  | -0.392224 |
| 9             | 1             | 0.623323                | 2.372931  | -1.110006 |
| 10            | 6             | 2.110004                | 1.247951  | -0.086290 |
| 11            | 6             | 2.854212                | 0.190295  | -0.475845 |
| 12            | 6             | 2.453000                | -1.023913 | -1.300261 |
| 13            | 1             | 1.796393                | -0.760391 | -2.129995 |
| 14            | 1             | 3.341089                | -1.480777 | -1.744715 |
| 15            | 6             | 1.779519                | -2.092061 | -0.390868 |
| 16            | 6             | 0.824703                | -1.386250 | 0.524504  |
| 17            | 6             | -1.581635               | -0.500307 | 0.927026  |
| 18            | 1             | -1.255738               | 0.226122  | 1.680593  |
| 19            | 1             | -1.976381               | -1.373353 | 1.458011  |
| 20            | 6             | 2.753988                | 2.337302  | 0.744877  |
| 21            | 1             | 3.814957                | 2.147153  | 0.920097  |
| 22            | 1             | 2.663822                | 3.308009  | 0.242018  |
| 23            | 1             | 2.256952                | 2.443429  | 1.717413  |
| 24            | 1             | -2.154667               | 0.890206  | -2.023042 |
| 25            | 6             | -3.461526               | -0.916956 | -0.740603 |
| 26            | 1             | -4.022930               | -1.535721 | -0.032358 |
| 27            | 1             | -4.183276               | -0.444938 | -1.414725 |
| 28            | 1             | 3.888985                | 0.180418  | -0.136803 |
| 29            | 1             | 0.207845                | 1.958763  | 0.520610  |
| 30            | 6             | -0.426946               | -0.857385 | -0.017392 |
| 31            | 1             | -0.763519               | -1.613782 | -0.741701 |
| 32            | 6             | 1.100773                | -1.372870 | 1.968350  |
| 33            | 1             | 0.664057                | -0.517246 | 2.487655  |
| 34            | 1             | 0.572605                | -2.264644 | 2.362891  |
| 35            | 1             | 2.157739                | -1.497152 | 2.205576  |
| 36            | 1             | 2.539349                | -2.614779 | 0.195572  |
| 37            | 1             | 1.240616                | -2.829166 | -0.999641 |
| 38            | 1             | -1.775510               | 2.035128  | -0.744427 |
| 39            | 1             | 0.046552                | 0.146044  | -1.935775 |
| 40            | 1             | -2.843039               | -1.585702 | -1.351041 |

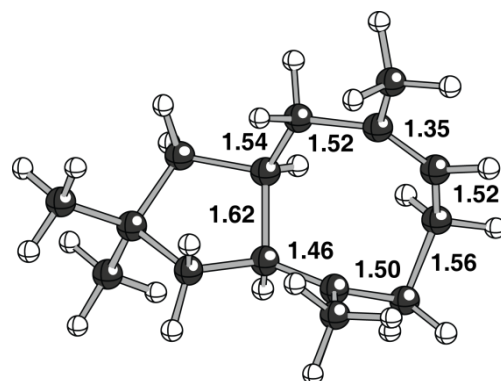

### Structure D'

B3LYP electronic energy: -586.4144409 H

B3LYP zero-point energy: 0.366323 H

mPW1PW91 electronic energy: -586.2842826 H

Coordinates (from last standard orientation):

| Center Number | Atomic Number | Coordinates (Angstroms) |           |           |
|---------------|---------------|-------------------------|-----------|-----------|
|               |               | X                       | Y         | Z         |
| 1             | 6             | -3.902872               | 0.702996  | 0.754199  |
| 2             | 1             | -4.652609               | -0.094694 | 0.783024  |
| 3             | 1             | -3.608151               | 0.928208  | 1.785288  |
| 4             | 1             | -4.387317               | 1.593894  | 0.341621  |
| 5             | 6             | -2.695353               | 0.291684  | -0.101318 |
| 6             | 6             | -1.578865               | 1.356356  | -0.087234 |
| 7             | 6             | -0.231897               | 0.684175  | -0.442357 |
| 8             | 6             | 0.937870                | 1.383935  | 0.271313  |
| 9             | 1             | 0.774376                | 2.453829  | 0.080855  |
| 10            | 6             | 2.395367                | 1.106357  | -0.075808 |
| 11            | 6             | 2.914745                | 0.059261  | -0.742878 |
| 12            | 6             | 2.216690                | -1.139647 | -1.348549 |
| 13            | 1             | 1.422766                | -0.854707 | -2.044609 |
| 14            | 1             | 2.934855                | -1.718477 | -1.934326 |
| 15            | 6             | 1.641770                | -2.130594 | -0.278020 |
| 16            | 6             | 0.575026                | -1.498385 | 0.530087  |
| 17            | 6             | -1.950576               | -0.917683 | 0.521810  |
| 18            | 1             | -1.866572               | -0.766636 | 1.602850  |
| 19            | 1             | -2.467522               | -1.869959 | 0.362309  |
| 20            | 6             | 3.315113                | 2.191069  | 0.442875  |
| 21            | 1             | 4.366297                | 1.949784  | 0.272102  |
| 22            | 1             | 3.101361                | 3.148600  | -0.048203 |
| 23            | 1             | 3.172492                | 2.352179  | 1.518913  |
| 24            | 1             | -1.772994               | 2.179102  | -0.785477 |
| 25            | 6             | -3.165609               | -0.014740 | -1.537958 |
| 26            | 1             | -3.876134               | -0.847966 | -1.545006 |
| 27            | 1             | -3.673873               | 0.855750  | -1.964522 |
| 28            | 1             | 3.994891                | 0.057464  | -0.872485 |
| 29            | 1             | 0.817202                | 1.298480  | 1.361802  |
| 30            | 6             | -0.564799               | -0.928358 | -0.154511 |
| 31            | 1             | -0.636356               | -1.369247 | -1.151119 |
| 32            | 6             | 0.767498                | -1.425772 | 1.986632  |
| 33            | 1             | 0.005687                | -0.872463 | 2.531315  |
| 34            | 1             | 0.799300                | -2.461968 | 2.364309  |
| 35            | 1             | 1.772387                | -1.031375 | 2.195679  |
| 36            | 1             | 2.448987                | -2.512768 | 0.350963  |
| 37            | 1             | 1.184731                | -2.975038 | -0.817372 |
| 38            | 1             | -1.506309               | 1.794225  | 0.916227  |
| 39            | 1             | -0.048409               | 0.712080  | -1.518565 |
| 40            | 1             | -2.343740               | -0.272222 | -2.215267 |

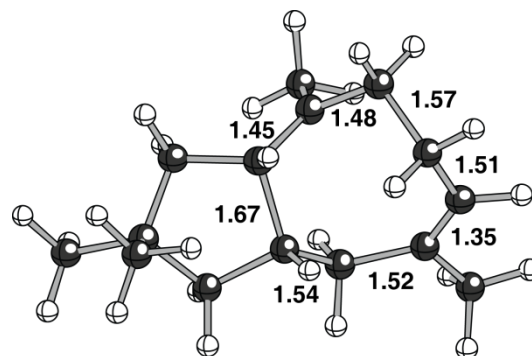

Structure D' → E'

B3LYP electronic energy: -586.4034256 H

B3LYP zero-point energy: 0.363823 H

mPW1PW91 electronic energy: -586.2760572 H

Imaginary frequency: -360.9702 cm<sup>-1</sup>

Coordinates (from last standard orientation):

31 - 16 H C distance = 1.348

31 - 30 H C distance = 1.294

Valence > maximum for atom=31 type=H valence=2 max=1

| Center Number | Atomic Number | Coordinates (Angstroms) |           |           |
|---------------|---------------|-------------------------|-----------|-----------|
|               |               | X                       | Y         | Z         |
| 1             | 6             | 3.652729                | -1.213123 | 0.669103  |
| 2             | 1             | 4.329360                | -0.556807 | 1.226937  |
| 3             | 1             | 3.215517                | -1.928817 | 1.373825  |
| 4             | 1             | 4.258344                | -1.776821 | -0.047678 |
| 5             | 6             | 2.566932                | -0.407126 | -0.057382 |
| 6             | 6             | 1.564077                | -1.315823 | -0.823272 |
| 7             | 6             | 0.151113                | -0.656111 | -0.736607 |
| 8             | 6             | -0.860983               | -1.653519 | -0.110114 |
| 9             | 1             | -0.851880               | -2.538608 | -0.762432 |
| 10            | 6             | -2.305167               | -1.273975 | 0.148572  |
| 11            | 6             | -2.971345               | -0.215940 | -0.342146 |
| 12            | 6             | -2.470804               | 0.889881  | -1.243941 |
| 13            | 1             | -1.864349               | 0.522102  | -2.073918 |
| 14            | 1             | -3.334877               | 1.366891  | -1.717371 |
| 15            | 6             | -1.744878               | 2.004370  | -0.472829 |
| 16            | 6             | -0.465798               | 1.713944  | 0.297286  |
| 17            | 6             | 1.638268                | 0.330621  | 0.942736  |
| 18            | 1             | 1.365785                | -0.338163 | 1.772659  |
| 19            | 1             | 2.091436                | 1.219435  | 1.383846  |
| 20            | 6             | -3.015788               | -2.277826 | 1.030165  |
| 21            | 1             | -4.069930               | -2.024984 | 1.162728  |
| 22            | 1             | -2.962603               | -3.284727 | 0.597280  |
| 23            | 1             | -2.549871               | -2.337189 | 2.021973  |
| 24            | 1             | 1.871334                | -1.467109 | -1.861803 |
| 25            | 6             | 3.225479                | 0.608990  | -1.011596 |
| 26            | 1             | 3.860290                | 1.315000  | -0.465365 |
| 27            | 1             | 3.854907                | 0.092490  | -1.742579 |
| 28            | 1             | -4.015147               | -0.119495 | -0.048406 |
| 29            | 1             | -0.434463               | -2.010392 | 0.837957  |
| 30            | 6             | 0.363621                | 0.574051  | 0.159693  |
| 31            | 1             | 0.556819                | 1.621174  | -0.575841 |
| 32            | 6             | -0.144615               | 2.779628  | 1.321391  |
| 33            | 1             | 0.909009                | 2.844286  | 1.588149  |
| 34            | 1             | -0.492766               | 3.758872  | 0.985838  |
| 35            | 1             | -0.703402               | 2.524690  | 2.231054  |
| 36            | 1             | -2.428513               | 2.404628  | 0.286939  |
| 37            | 1             | -1.532799               | 2.861547  | -1.128883 |
| 38            | 1             | 1.529817                | -2.305496 | -0.356404 |
| 39            | 1             | -0.192407               | -0.362876 | -1.726684 |
| 40            | 1             | 2.493342                | 1.192132  | -1.588161 |

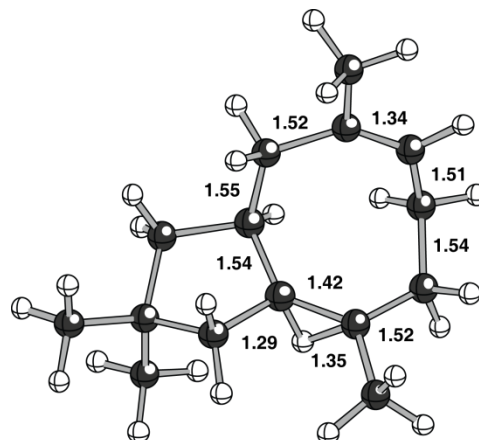

### Structure E'

B3LYP electronic energy: -586.4208055 H

B3LYP zero-point energy: 0.366256 H

mPW1PW91 electronic energy: -586.2929108 H

Coordinates (from last standard orientation):

| Center Number | Atomic Number | Coordinates (Angstroms) |           |           |
|---------------|---------------|-------------------------|-----------|-----------|
|               |               | X                       | Y         | Z         |
| 1             | 6             | 3.509953                | 0.490900  | -0.931436 |
| 2             | 1             | 3.911585                | -0.233373 | -1.647804 |
| 3             | 1             | 3.134052                | 1.352916  | -1.493264 |
| 4             | 1             | 4.342852                | 0.834358  | -0.309520 |
| 5             | 6             | 2.415543                | -0.136203 | -0.058165 |
| 6             | 6             | 1.771211                | 0.880308  | 0.918075  |
| 7             | 6             | 0.333301                | 0.368235  | 1.192779  |
| 8             | 6             | -0.764285               | 1.465413  | 1.246432  |
| 9             | 1             | -1.547609               | 1.210190  | 1.964078  |
| 10            | 6             | -1.352436               | 1.628028  | -0.154251 |
| 11            | 6             | -2.353078               | 0.830555  | -0.606933 |
| 12            | 6             | -3.113025               | -0.224627 | 0.155645  |
| 13            | 1             | -3.769942               | 0.252951  | 0.895886  |
| 14            | 1             | -3.778740               | -0.736728 | -0.543902 |
| 15            | 6             | -2.243399               | -1.276287 | 0.897799  |
| 16            | 6             | -0.985475               | -1.642323 | 0.089580  |
| 17            | 6             | 1.173278                | -0.564980 | -0.910531 |
| 18            | 1             | 0.960057                | 0.237530  | -1.638753 |
| 19            | 1             | 1.288742                | -1.484378 | -1.489609 |
| 20            | 6             | -0.791378               | 2.729238  | -1.012589 |
| 21            | 1             | -1.255038               | 2.756711  | -2.001390 |
| 22            | 1             | -0.961709               | 3.699572  | -0.528020 |
| 23            | 1             | 0.295183                | 2.643789  | -1.141144 |
| 24            | 1             | 2.343800                | 0.988947  | 1.843339  |
| 25            | 6             | 2.978839                | -1.357392 | 0.694690  |
| 26            | 1             | 3.331568                | -2.122881 | -0.004404 |
| 27            | 1             | 3.828633                | -1.059023 | 1.316312  |
| 28            | 1             | -2.683567               | 0.999984  | -1.630671 |
| 29            | 1             | -0.313985               | 2.400487  | 1.591900  |
| 30            | 6             | 0.040895                | -0.582638 | 0.039367  |
| 31            | 1             | -0.414904               | -2.362285 | 0.726076  |
| 32            | 6             | -1.295040               | -2.353951 | -1.238704 |
| 33            | 1             | -0.409032               | -2.804503 | -1.691124 |
| 34            | 1             | -2.014783               | -3.156648 | -1.060448 |
| 35            | 1             | -1.731971               | -1.661290 | -1.963653 |
| 36            | 1             | -2.833841               | -2.182483 | 1.060775  |
| 37            | 1             | -1.959183               | -0.917428 | 1.889633  |
| 38            | 1             | 1.733715                | 1.869026  | 0.449073  |
| 39            | 1             | 0.314166                | -0.225159 | 2.119093  |
| 40            | 1             | 2.240529                | -1.825951 | 1.356996  |

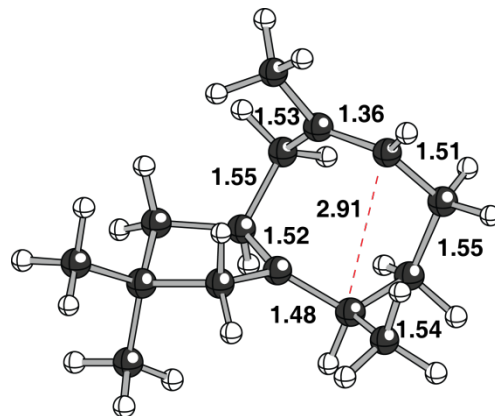

Structure TSE'  $\rightarrow$  F

B3LYP electronic energy: -586.4193086 H

B3LYP zero-point energy: 0.367606 H

mPW1PW91 electronic energy: -586.2951401 H

Imaginary frequency: -129.3186  $\text{cm}^{-1}$

Coordinates (from last standard orientation):

| Center Number | Atomic Number | Coordinates (Angstroms) |           |           |
|---------------|---------------|-------------------------|-----------|-----------|
|               |               | X                       | Y         | Z         |
| 1             | 6             | 3.470197                | 0.271116  | -0.791717 |
| 2             | 1             | 3.793404                | -0.427778 | -1.570352 |
| 3             | 1             | 3.249019                | 1.231789  | -1.270213 |
| 4             | 1             | 4.316208                | 0.422049  | -0.113235 |
| 5             | 6             | 2.256040                | -0.273363 | -0.024518 |
| 6             | 6             | 1.740735                | 0.726293  | 1.045359  |
| 7             | 6             | 0.233161                | 0.429517  | 1.240771  |
| 8             | 6             | -0.698907               | 1.668765  | 1.259527  |
| 9             | 1             | -1.573950               | 1.516038  | 1.898068  |
| 10            | 6             | -1.079590               | 1.715712  | -0.204277 |
| 11            | 6             | -1.934589               | 0.761838  | -0.720802 |
| 12            | 6             | -2.987143               | -0.017642 | 0.036766  |
| 13            | 1             | -3.565285               | 0.654894  | 0.680417  |
| 14            | 1             | -3.686679               | -0.431932 | -0.692667 |
| 15            | 6             | -2.350739               | -1.154065 | 0.877612  |
| 16            | 6             | -1.066753               | -1.589131 | 0.156482  |
| 17            | 6             | 1.012537                | -0.416569 | -0.967005 |
| 18            | 1             | 1.000874                | 0.440079  | -1.650333 |
| 19            | 1             | 1.037486                | -1.313595 | -1.588453 |
| 20            | 6             | -0.396020               | 2.701126  | -1.090965 |
| 21            | 1             | -0.579042               | 2.520602  | -2.152185 |
| 22            | 1             | -0.800788               | 3.693360  | -0.840766 |
| 23            | 1             | 0.680251                | 2.764330  | -0.900030 |
| 24            | 1             | 2.291729                | 0.641664  | 1.986403  |
| 25            | 6             | 2.619686                | -1.628268 | 0.615113  |
| 26            | 1             | 2.880882                | -2.366781 | -0.150081 |
| 27            | 1             | 3.486118                | -1.514335 | 1.274154  |
| 28            | 1             | -1.998839               | 0.730408  | -1.807020 |
| 29            | 1             | -0.188880               | 2.574438  | 1.593729  |
| 30            | 6             | -0.174219               | -0.379539 | -0.037184 |
| 31            | 1             | -0.472811               | -2.206206 | 0.855656  |
| 32            | 6             | -1.345046               | -2.429752 | -1.099175 |
| 33            | 1             | -0.431897               | -2.845584 | -1.531108 |
| 34            | 1             | -1.990929               | -3.272076 | -0.836729 |
| 35            | 1             | -1.851388               | -1.852604 | -1.879109 |
| 36            | 1             | -3.040852               | -1.993487 | 0.994522  |
| 37            | 1             | -2.120112               | -0.795328 | 1.884624  |
| 38            | 1             | 1.885753                | 1.752673  | 0.690078  |
| 39            | 1             | 0.076168                | -0.191800 | 2.129028  |
| 40            | 1             | 1.807451                | -2.047039 | 1.219682  |

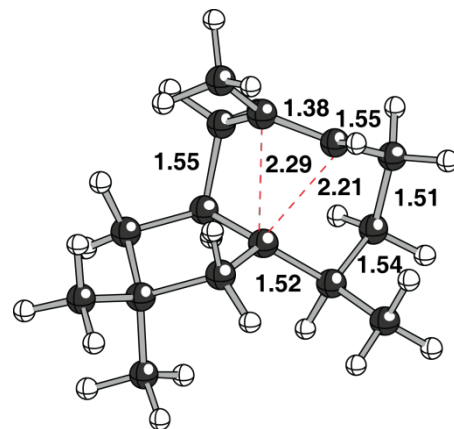



## Structure F

B3LYP electronic energy: -586.4378871 H

B3LYP zero-point energy: 0.366841 H

mPW1PW91 electronic energy: -586.3173747 H

Coordinates (from last standard orientation):

| Center Number | Atomic Number | Coordinates (Angstroms) |           |           |
|---------------|---------------|-------------------------|-----------|-----------|
|               |               | X                       | Y         | Z         |
| 1             | 6             | -3.388392               | -1.042122 | -0.955218 |
| 2             | 1             | -3.897902               | -0.339085 | -1.623029 |
| 3             | 1             | -2.949420               | -1.834064 | -1.573046 |
| 4             | 1             | -4.150991               | -1.498888 | -0.315447 |
| 5             | 6             | -2.320772               | -0.325983 | -0.114121 |
| 6             | 6             | -1.521513               | -1.310261 | 0.771756  |
| 7             | 6             | -0.186764               | -0.601072 | 1.094963  |
| 8             | 6             | 1.023946                | -1.561842 | 1.134376  |
| 9             | 1             | 1.766477                | -1.290814 | 1.908061  |
| 10            | 6             | 1.707477                | -1.413573 | -0.168441 |
| 11            | 6             | 1.373742                | -0.150370 | -0.775622 |
| 12            | 6             | 2.592985                | 0.774112  | -0.183894 |
| 13            | 1             | 3.438592                | 0.209380  | 0.221077  |
| 14            | 1             | 2.966025                | 1.322775  | -1.051407 |
| 15            | 6             | 1.905272                | 1.663146  | 0.858368  |
| 16            | 6             | 0.454725                | 1.838805  | 0.369735  |
| 17            | 6             | -1.194294               | 0.265135  | -1.001741 |
| 18            | 1             | -0.994400               | -0.438669 | -1.820778 |
| 19            | 1             | -1.487898               | 1.205877  | -1.472521 |
| 20            | 6             | 2.594137                | -2.429984 | -0.752341 |
| 21            | 1             | 1.920500                | -3.145778 | -1.258539 |
| 22            | 1             | 3.267000                | -2.031725 | -1.514764 |
| 23            | 1             | 3.135746                | -3.006488 | 0.003368  |
| 24            | 1             | -2.062546               | -1.610141 | 1.675245  |
| 25            | 6             | -2.997433               | 0.763228  | 0.743032  |
| 26            | 1             | -3.489187               | 1.506898  | 0.106971  |
| 27            | 1             | -2.291310               | 1.294612  | 1.388755  |
| 28            | 1             | -3.763487               | 0.321468  | 1.388780  |
| 29            | 1             | 1.434175                | -0.134361 | -1.865944 |
| 30            | 1             | 0.787790                | -2.613060 | 1.345909  |
| 31            | 6             | 0.070424                | 0.401917  | -0.111041 |
| 32            | 1             | -0.187858               | 2.134436  | 1.205591  |
| 33            | 6             | 0.352894                | 2.925189  | -0.713651 |
| 34            | 1             | -0.683194               | 3.117561  | -1.001573 |
| 35            | 1             | 0.761238                | 3.867574  | -0.335784 |
| 36            | 1             | 0.905012                | 2.667174  | -1.625246 |
| 37            | 1             | 2.441396                | 2.613243  | 0.955511  |
| 38            | 1             | 1.931828                | 1.188584  | 1.845740  |
| 39            | 1             | -1.329703               | -2.227877 | 0.196846  |
| 40            | 1             | -0.266499               | -0.056579 | 2.039257  |

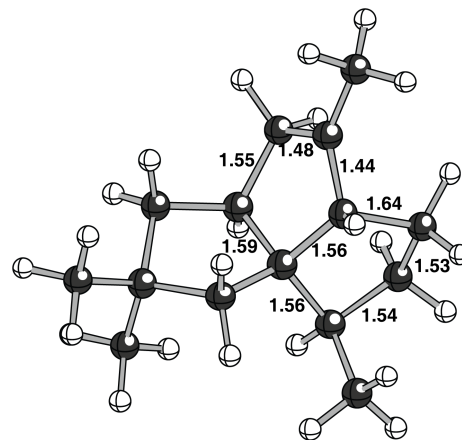

Structure TSF→pentalenene (1) (transition state structure #1)

B3LYP electronic energy: -1230.2355925 H

B3LYP zero-point energy: 0.402952 H

mPW1PW91 electronic energy: -1230.0337765 H

Imaginary frequency: -194.0440 cm<sup>-1</sup>

Coordinates (from last standard orientation):

| Center Number | Atomic Number | Coordinates (Angstroms) |           |           |
|---------------|---------------|-------------------------|-----------|-----------|
|               |               | X                       | Y         | Z         |
| 1             | 6             | 4.849937                | -1.663734 | 0.237254  |
| 2             | 1             | 5.681283                | -1.025035 | 0.558792  |
| 3             | 1             | 4.512931                | -2.238830 | 1.107648  |
| 4             | 1             | 5.244738                | -2.372302 | -0.500351 |
| 5             | 6             | 3.705597                | -0.827099 | -0.355756 |
| 6             | 6             | 2.484671                | -1.695601 | -0.738557 |
| 7             | 6             | 1.260618                | -0.749206 | -0.728810 |
| 8             | 6             | -0.011747               | -1.380444 | -0.141718 |
| 9             | 1             | -0.956620               | -0.959906 | -0.648872 |
| 10            | 6             | -0.193718               | -0.867673 | 1.199062  |
| 11            | 6             | 0.568785                | 0.397441  | 1.384878  |
| 12            | 6             | -0.375494               | 1.650534  | 1.201897  |
| 13            | 1             | -1.429192               | 1.422476  | 1.380050  |
| 14            | 1             | -0.072026               | 2.409797  | 1.928777  |
| 15            | 6             | -0.095928               | 2.106547  | -0.237205 |
| 16            | 6             | 1.411765                | 1.852941  | -0.445995 |
| 17            | 6             | 3.080445                | 0.119581  | 0.699169  |
| 18            | 1             | 3.030788                | -0.423693 | 1.652704  |
| 19            | 1             | 3.696905                | 1.003801  | 0.883218  |
| 20            | 6             | -1.146957               | -1.373414 | 2.139751  |
| 21            | 1             | -1.326424               | -2.448706 | 2.075738  |
| 22            | 1             | -1.027683               | -1.015147 | 3.163406  |
| 23            | 1             | -2.146430               | -0.898368 | 1.736634  |
| 24            | 1             | 2.612119                | -2.205060 | -1.700657 |
| 25            | 6             | 4.234865                | -0.048541 | -1.577448 |
| 26            | 1             | 5.043743                | 0.631399  | -1.285226 |
| 27            | 1             | 3.457449                | 0.549293  | -2.062158 |
| 28            | 1             | 4.635477                | -0.739032 | -2.328643 |
| 29            | 1             | 1.000909                | 0.413948  | 2.392244  |
| 30            | 1             | -0.131059               | -2.463125 | -0.252496 |
| 31            | 6             | 1.637273                | 0.456382  | 0.231630  |
| 32            | 1             | 1.634325                | 1.784167  | -1.517080 |
| 33            | 6             | 2.260294                | 2.999281  | 0.129895  |
| 34            | 1             | 3.324398                | 2.876228  | -0.092269 |
| 35            | 1             | 1.944745                | 3.950839  | -0.311652 |
| 36            | 1             | 2.157865                | 3.090746  | 1.217616  |
| 37            | 1             | -0.371442               | 3.155262  | -0.392884 |
| 38            | 1             | -0.693802               | 1.507238  | -0.932167 |
| 39            | 1             | 2.353765                | -2.479588 | 0.020610  |
| 40            | 1             | 1.061659                | -0.382991 | -1.740192 |
| 41            | 15            | -3.650609               | -0.202610 | -0.404891 |
| 42            | 8             | -3.485878               | -0.239883 | 1.109137  |
| 43            | 8             | -4.712819               | -1.367369 | -0.862862 |
| 44            | 8             | -4.440753               | 1.198217  | -0.731452 |
| 45            | 8             | -2.442633               | -0.328134 | -1.311405 |
| 46            | 1             | -4.419581               | 1.376953  | -1.682402 |
| 47            | 1             | -5.425478               | -1.445834 | -0.212649 |

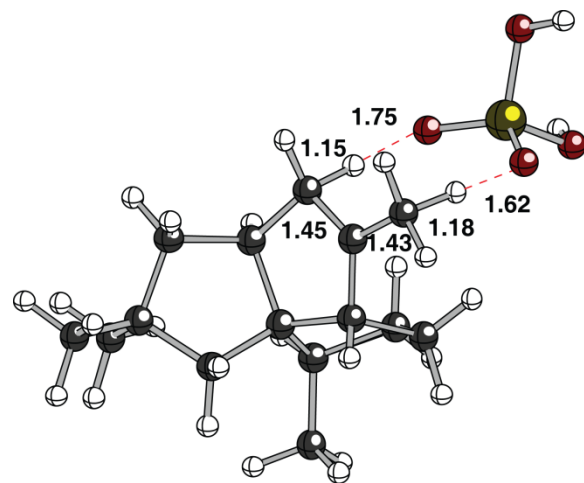

Structure TSF→pentalenene (1) (transition state structure #1)

B3LYP electronic energy: -1230.2259929 H

B3LYP zero-point energy: 0.403172 H

mPW1PW91 electronic energy: -1230.0239357 H

Imaginary frequency: -178.2716 cm<sup>-1</sup>

Coordinates (from last standard orientation):

| Center Number | Atomic Number | Coordinates (Angstroms) |           |           |
|---------------|---------------|-------------------------|-----------|-----------|
|               |               | X                       | Y         | Z         |
| 1             | 6             | 4.599783                | -1.794157 | 0.085897  |
| 2             | 1             | 5.503919                | -1.173823 | 0.101078  |
| 3             | 1             | 4.420041                | -2.150866 | 1.106971  |
| 4             | 1             | 4.810283                | -2.667818 | -0.541981 |
| 5             | 6             | 3.394938                | -1.005789 | -0.451790 |
| 6             | 6             | 2.093882                | -1.844501 | -0.430594 |
| 7             | 6             | 0.919724                | -0.837242 | -0.335523 |
| 8             | 6             | -0.140739               | -1.237836 | 0.692041  |
| 9             | 1             | -1.205534               | -0.864551 | 0.405454  |
| 10            | 6             | -0.073742               | -0.368938 | 1.817937  |
| 11            | 6             | 0.701365                | 0.850743  | 1.496966  |
| 12            | 6             | -0.274220               | 2.047957  | 1.135549  |
| 13            | 1             | -1.295783               | 1.884740  | 1.487766  |
| 14            | 1             | 0.106500                | 2.953388  | 1.616864  |
| 15            | 6             | -0.192254               | 2.132708  | -0.397875 |
| 16            | 6             | 1.255202                | 1.734660  | -0.750220 |
| 17            | 6             | 3.015838                | 0.169066  | 0.484387  |
| 18            | 1             | 3.110025                | -0.182676 | 1.521605  |
| 19            | 1             | 3.694914                | 1.020955  | 0.387028  |
| 20            | 6             | -0.867403               | -0.552555 | 3.038693  |
| 21            | 1             | -0.791899               | -1.573858 | 3.425191  |
| 22            | 1             | -0.651915               | 0.181893  | 3.816008  |
| 23            | 1             | -1.914439               | -0.441232 | 2.685269  |
| 24            | 1             | 2.005067                | -2.502551 | -1.301814 |
| 25            | 6             | 3.713790                | -0.521117 | -1.880943 |
| 26            | 1             | 4.575299                | 0.156938  | -1.880650 |
| 27            | 1             | 2.873507                | 0.005551  | -2.341361 |
| 28            | 1             | 3.959684                | -1.372510 | -2.525792 |
| 29            | 1             | 1.307983                | 1.131543  | 2.367152  |
| 30            | 1             | -0.347482               | -2.297074 | 0.867848  |
| 31            | 6             | 1.532082                | 0.525572  | 0.203742  |
| 32            | 1             | 1.301093                | 1.404465  | -1.793483 |
| 33            | 6             | 2.225118                | 2.917053  | -0.586995 |
| 34            | 1             | 3.238317                | 2.670386  | -0.917777 |
| 35            | 1             | 1.882903                | 3.762557  | -1.193432 |
| 36            | 1             | 2.291064                | 3.262741  | 0.451921  |
| 37            | 1             | -0.449670               | 3.135206  | -0.756947 |
| 38            | 1             | -0.898157               | 1.430894  | -0.853575 |
| 39            | 1             | 2.104173                | -2.493291 | 0.456202  |
| 40            | 1             | 0.439006                | -0.698660 | -1.306754 |
| 41            | 15            | -3.362248               | -0.379786 | -0.586472 |
| 42            | 8             | -2.250596               | -0.405667 | -1.602190 |
| 43            | 8             | -4.263036               | 0.993674  | -0.733496 |
| 44            | 8             | -4.432662               | -1.568800 | -0.968734 |
| 45            | 8             | -3.004136               | -0.480574 | 0.892170  |
| 46            | 1             | -5.063699               | -1.693849 | -0.245937 |
| 47            | 1             | -4.388222               | 1.205483  | -1.669407 |

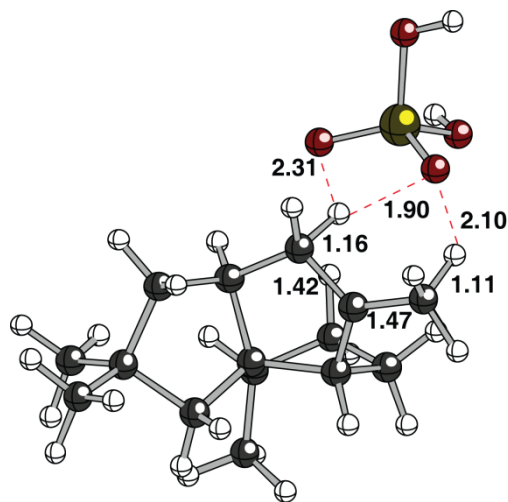

Pentalenene (1)

B3LYP electronic energy: -586.0984116 H

B3LYP zero-point energy: 0.356593 H

mPW1PW91 electronic energy: -585.9433723 H

Coordinates (from last standard orientation):

| Center Number | Atomic Number | Coordinates (Angstroms) |           |           |
|---------------|---------------|-------------------------|-----------|-----------|
|               |               | X                       | Y         | Z         |
| 1             | 6             | -0.132282               | -0.745202 | 1.074140  |
| 2             | 1             | -0.106694               | -0.263852 | 2.062081  |
| 3             | 6             | 1.010875                | -1.712484 | 0.921183  |
| 4             | 1             | 1.104245                | -2.602569 | 1.540965  |
| 5             | 6             | 1.860308                | -1.390887 | -0.064669 |
| 6             | 6             | 3.058491                | -2.180201 | -0.507428 |
| 7             | 1             | 3.982528                | -1.593107 | -0.428766 |
| 8             | 1             | 3.184401                | -3.087785 | 0.090703  |
| 9             | 1             | 2.965265                | -2.476743 | -1.560978 |
| 10            | 6             | 1.481702                | -0.080775 | -0.730934 |
| 11            | 1             | 1.396518                | -0.218378 | -1.818207 |
| 12            | 6             | 2.471099                | 1.075553  | -0.416527 |
| 13            | 1             | 3.486875                | 0.720131  | -0.214153 |
| 14            | 1             | 2.538577                | 1.760529  | -1.269650 |
| 15            | 6             | 1.838669                | 1.786172  | 0.790239  |
| 16            | 1             | 2.044981                | 1.215022  | 1.704018  |
| 17            | 1             | 2.223638                | 2.800365  | 0.946584  |
| 18            | 6             | 0.324006                | 1.762308  | 0.486466  |
| 19            | 6             | 0.100039                | 0.315906  | -0.076869 |
| 20            | 6             | -0.070724               | 2.903573  | -0.466220 |
| 21            | 1             | -1.152301               | 2.948333  | -0.624375 |
| 22            | 1             | 0.237766                | 3.866992  | -0.044059 |
| 23            | 1             | 0.402545                | 2.806543  | -1.450078 |
| 24            | 6             | -1.119162               | 0.097956  | -1.007426 |
| 25            | 1             | -1.399057               | 0.984864  | -1.584755 |
| 26            | 1             | -0.859846               | -0.679749 | -1.737997 |
| 27            | 6             | -2.285761               | -0.439742 | -0.141092 |
| 28            | 6             | -3.004657               | 0.690074  | 0.624535  |
| 29            | 1             | -3.812490               | 0.279568  | 1.242069  |
| 30            | 1             | -2.329496               | 1.237093  | 1.288538  |
| 31            | 1             | -3.451674               | 1.412580  | -0.069024 |
| 32            | 6             | -1.535875               | -1.377829 | 0.838204  |
| 33            | 1             | -2.091454               | -1.530762 | 1.771127  |
| 34            | 6             | -3.320081               | -1.195542 | -0.990705 |
| 35            | 1             | -3.806649               | -0.524859 | -1.709600 |
| 36            | 1             | -2.851204               | -2.009747 | -1.555389 |
| 37            | 1             | -4.105798               | -1.631815 | -0.361995 |
| 38            | 1             | -1.415811               | -2.363586 | 0.371253  |
| 39            | 1             | -0.244751               | 1.897656  | 1.414303  |

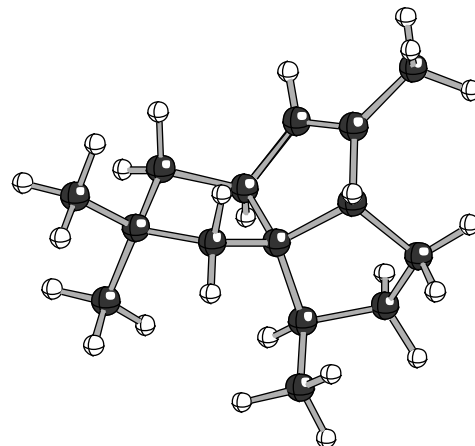

## Synthesis of [6-<sup>2</sup>H]-FPP

[6-<sup>2</sup>H]-FPP is a known compound, as is the alcohol starting material shown below (see, Cane, D. E.; Tandon, M. *Tetrahedron Lett.* **1994**, *35*, 5355-5358.). Additional details are given here, however, for the conversion of the latter to the former.

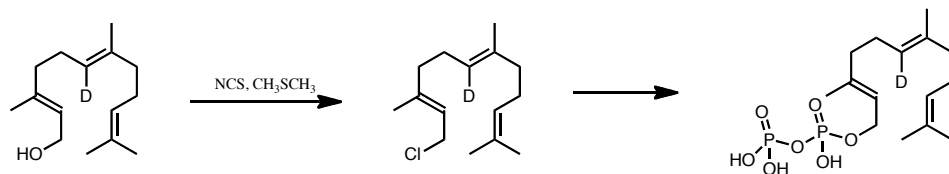

### References:

*Organic Syntheses, Coll. Vol. 8*, 616, **1993**.

*JACS*, *132*, 4281–4289, **2010**.

To a stirred solution of *N*-chlorosuccinimide (80 mg, 0.6 mmol; recrystallized from benzene before use) in anhydrous dichloromethane (5 mL) in a 25 mL round bottom flask (flame dried before use) under N<sub>2</sub> at -40 °C (dry ice–acetonitrile bath) was added dimethyl sulfide (44 μL, 0.6 mmol; filtered through basic aluminum oxide before use). After being stirred at -40 °C for 15 min, the mixture was allowed to warm to 0 °C in an ice–water bath. The mixture was cooled to -40 °C again, and the deuterated alcohol (110 mg, 0.5 mmol) in 1 mL anhydrous dichloromethane was added. The resulting mixture was then stirred at 0 °C for 2 hours and then at room temperature overnight. The reaction was diluted with hexanes (50 mL), and washed with brine (50 mL). The organics were separated, and dried over sodium sulfate. Solvents were removed to afford the crude product, which was used for next step without further purification.

The crude chloride dissolved in anhydrous acetonitrile (2 mL) was added to a well–stirred solution of tris(tetrabutylammonium) hydrogen pyrophosphate (900 mg, 1.0 mmol) in anhydrous acetonitrile (3 mL) containing molecular sieves. The mixture was stirred at room temperature overnight. The mixture was filtered through a pad of celite, and concentrated to furnish the crude product. The crude product was dissolved in 2 mL ion exchange buffer (1g ammonium bicarbonate dissolved in 500 mL of 2% (v/v) isopropanol/water), and loaded onto a DOWEX-50W–X8 cation–exchange resin (NH<sub>4</sub><sup>+</sup> form, 100–200 mesh) column (1cm diameter, 10 cm high). The column was eluted with 2 column volumes of ion exchange buffer. The combined eluant was washed with ether, and then concentrated to furnish a crude white powder, which was extracted with methanol (5mL X 6). The methanol extracts were concentrated, and re-dissolved in 4 mL methanol. To the solution was added 12 mL ethyl ether to precipitate the product, which was collected after centrifugation (85 mg, 39%).

DOWEX-50W-X8 cation-exchange resin ( $\text{NH}_4^+$  form) column preparation:

1. The column (1cm diameter) was packed with DOWEX-50W-X8 cation-exchange resin.
2. The column was washed with 2 column volumes of ammonium hydroxide.
3. The column was washed with distilled water to pH=7-8.
4. The column was washed with 2 column volumes of ion exchange buffer. At this point, the height of the column is about 10 cm.
